# Supplementary material for: Investigating healthcare workforce recruitment and retention: a mixed-methods study protocol
Source: PubMed Central journal article supplement — BMJ Open. 2024 Feb 8;14(2):e074100. doi: 10.1136/bmjopen-2023-074100 (PMC10860040; doi:10.1136/bmjopen-2023-074100), 2024-02-08
Supplement: bmjopen-2023-074100.draft_revisions.pdf [file bmjopen-2023-074100.draft_revisions.pdf]

# BMJ Open

BMJ Open is committed to open peer review. As part of this commitment we make the peer review history of every article we publish publicly available.

When an article is published we post the peer reviewers' comments and the authors' responses online. We also post the versions of the paper that were used during peer review. These are the versions that the peer review comments apply to.

The versions of the paper that follow are the versions that were submitted during the peer review process. They are not the versions of record or the final published versions. They should not be cited or distributed as the published version of this manuscript.

BMJ Open is an open access journal and the full, final, typeset and author-corrected version of record of the manuscript is available on our site with no access controls, subscription charges or pay-per-view fees (<http://bmjopen.bmj.com>).

If you have any questions on BMJ Open's open peer review process please email [info.bmjopen@bmj.com](mailto:info.bmjopen@bmj.com)

# BMJ Open

## Investigating healthcare workforce recruitment and retention: A mixed methods study protocol

|                               |                                                                                                                                                                |
|-------------------------------|----------------------------------------------------------------------------------------------------------------------------------------------------------------|
| Journal:                      | <i>BMJ Open</i>                                                                                                                                                |
| Manuscript ID                 | bmjopen-2023-074100                                                                                                                                            |
| Article Type:                 | Protocol                                                                                                                                                       |
| Date Submitted by the Author: | 27-Mar-2023                                                                                                                                                    |
| Complete List of Authors:     | Alkan, Erkan; University of Suffolk<br>Cushen-Brewster, Noreen; University of Suffolk<br>Anyanwu, Philip; University of Suffolk                                |
| Keywords:                     | Health policy < HEALTH SERVICES ADMINISTRATION & MANAGEMENT,<br>Nursing Care, Organisation of health services < HEALTH SERVICES<br>ADMINISTRATION & MANAGEMENT |
|                               |                                                                                                                                                                |

SCHOLARONE™  
Manuscripts

# Investigating healthcare workforce recruitment and retention: A mixed methods study protocol

Erkan Alkan<sup>1\*</sup>, Noreen Cushen-Brewster<sup>1</sup>, Philip Anyanwu<sup>1</sup>

<sup>1</sup> Institute of Health and Well-being, University of Suffolk, Ipswich, UK

\*Corresponding Author, Full Address: Institute of Health and Well-being, University of Suffolk, Waterfront Building, 19 Neptune Quay, Ipswich IP4 1QJ, UK, phone: +441473338357, email: e.alkan@uos.ac.uk

Noreen Cushen-Brewster: email: n.cushen-brewster2@uos.ac.uk

Philip Anyanwu: email: p.anyanwu2@uos.ac.uk

## Abstract

**Introduction:** Although the sustainability of the health workforce has been identified as essential to achieving health and wider development objectives, challenges with securing and retaining the healthcare workforce persist. In the UK, there are notable shortages across a wide range of National Health Service (NHS) staff groups, with a high staff turnover indicating retention issues in the healthcare workforce. In addition, gaps exist in understanding the root cause of individual organisation's workforce deficiencies and how their practice environment factors interact to impact workforce recruitment and retention.

**Methods and analysis:** An exploratory mixed-methods approach will be conducted to investigate the impact of organisational practice environment factors on healthcare workforce recruitment and retention in two Integrated Care Systems (ICS) in the East of England. We will conduct an online survey of newly qualified and established nurses and allied health professionals using a questionnaire adapted from two validated instruments. Multi-level linear regression models will be fitted to evaluate the association between organisational practice environmental factors and staff recruitment and retention. The qualitative interviews will explore the experiences and perspectives of staff and senior leaders to explain the survey results and any significant associations therein. Also, the interviews will explore how to strengthen the partnership between higher education institutions, Health Education England, health

1  
2  
3 and care service providers, NHS nursing and allied health professional staff to  
4 enhance recruiting and retaining staff. An exploratory inductive coding and analysis  
5 will follow Braun & Clarke's recommendations to generate key themes from  
6 transcribed interview data.  
7  
8  
9

10  
11 **Ethics and dissemination:** Ethical approval has been obtained through the University  
12 of Suffolk Research Ethics Committee (approval number: RETH(S)22/051). Findings  
13 from our work will be disseminated through publications in peer-reviewed journals;  
14 presentations at stakeholders' events, professional and academic conferences; and  
15 short reports for stakeholders, including participating ICSs.  
16  
17  
18  
19

20  
21 **Keywords:** health-workforce, organisational aspect, turnover, retention, recruitment  
22

23 **Word Count:** 2977  
24  
25

### 26 **Strengths and limitations of this study**

27

- 28 • This study will provide new insight into the relationship between turnover  
29 intention and organisational climate in nurses and allied health professionals in  
30 the East Anglia region.
- 31 • The study combines qualitative and quantitative research methods to gain a  
32 grounded, multifaceted perspective on the issue of workforce recruitment and  
33 retention.
- 34 • By including healthcare workers and senior leaders, our study will approach the  
35 organisational practice environment issues from different perspectives.
- 36 • Due to the scope of the research, the study sample will be limited to the East  
37 of England. Including participants from other regions may provide a more  
38 representative perspective of healthcare workforce issues in England.  
39  
40  
41  
42  
43  
44  
45  
46  
47  
48  
49  
50  
51  
52  
53  
54  
55  
56  
57  
58  
59  
60

## INTRODUCTION

Appropriate staffing and skill mix are crucial determinants of performance and quality in healthcare delivery. Although the sustainability of the health workforce has been identified as essential to achieving health and wider development objectives,<sup>1</sup> a challenge with securing and retaining the healthcare workforce persists globally.<sup>2</sup> Countries at all socioeconomic development levels face workforce development, recruitment, and retention issues.<sup>1</sup> Evidence from European countries, including the UK, suggests an increase in healthcare staff quitting their posts, from 5% to 17%, over three years.<sup>3</sup> In the UK, a high staff turnover, an indicator of retention issues in the healthcare workforce, persists.<sup>2</sup>

There are notable shortages across a wide range of National Health Service (NHS) staff groups in the UK; the most challenging include nurses and allied health professionals (AHPs), who are critical to delivering aspirations for 21st-century care set out in the NHS Long-Term Plan.<sup>4,5</sup> AHPs are a diverse group of professionals who provide various high-quality care across health and social care pathways. About 230,000 AHPs in 14 professions (including paramedics, physiotherapists, occupational therapists, and dieticians, among others) worked independently across the spectrum of care from primary to specialist care provision in the UK in 2021.<sup>6</sup> Recently, there has been a decline in previous achievements to increase the FTE number of allied health professionals in the UK.<sup>7</sup> A similar trend is seen across the NHS workforce, including the nursing staff.

The Nursing and Midwifery Council's register recorded that 6.5% of nurses left the register between 2012 and 2013.<sup>8</sup> Most of those who left were of active service age; only 1.2% of registered nurses left due to retirement. However, nurses quitting rates may be underreported given that some leave work while still registered, and some take up shift jobs within the NHS away from direct clinical care.<sup>9</sup>

Studies have identified structural factors implicated in healthcare workforce recruitment and retention. For instance, pay level has been reported as important in healthcare workforce retention.<sup>10</sup> An interplay exists between the cost of living and healthcare workforce recruitment and retention in the UK. For example, the Royal College of Nursing members in England, Northern Ireland and Wales held strike

1  
2  
3 actions in late 2022 and early 2023 on pay dispute, worsened by the current cost of  
4 living crisis.<sup>11</sup>  
5  
6

7 Evidence from UK studies suggests that the COVID-19 pandemic further exacerbated  
8 healthcare workforce recruitment and retention issues. COVID-19 infection among  
9 frontline staff, difficult working conditions, increased workload, and burnout are  
10 reported COVID-19-related factors exacerbating healthcare workforce challenges.<sup>12–  
11 14</sup>  
12  
13  
14  
15

16  
17 Despite the focus and investment by the Department of Health and Social Care in the  
18 workforce,<sup>15,16</sup> there remain considerable challenges in filling the roles required  
19 across both sectors to meet the demands. Many approaches have been explored to  
20 provide the most appropriate solutions; however, overwhelming challenges must be  
21 overcome to improve staff retention across Integrated Care Systems.  
22  
23  
24  
25

26  
27 Recruitment and retention issues affect different aspects of health and care services.  
28 A high turnover and shortage of nurses and AHPs impact care quality, patient  
29 outcomes, and the cost of healthcare delivery.<sup>2,17,18</sup> Studies have shown that a crucial  
30 time for the turnover of nurses is during the first year post-qualification.<sup>3,19,20</sup>  
31 Psychological issues, including anxiety and stress due to work pressure in the early  
32 days of work, are common reasons for quitting among newly qualified nurses  
33 (NQNs).<sup>21</sup> Some studies suggest that professionals, such as nurses, often feel ill-  
34 prepared for their roles and quit their profession; lack of self-confidence has been  
35 implicated in performance rate, stress levels, and the difference between expectations  
36 and reality.<sup>22</sup> Negative experiences during clinical placements, such as a safe learning  
37 environment and lack of health and well-being support from colleagues, can also  
38 influence NQNs negatively.<sup>23</sup> Understanding the organisational practice environment  
39 important in NQNs' decision on employment within the sector is essential in reducing  
40 turnover and increasing retention.  
41  
42  
43  
44  
45  
46  
47  
48  
49  
50

51  
52 With the emergence of integrated care systems (ICS) in England, there is an  
53 increasing need to upskill and consolidate services across systems to provide  
54 enhanced integration of health and social care rather than just individual institutions.<sup>24</sup>  
55 In addition, given the unprecedented challenges facing the NHS, systems need  
56 healthcare professionals to work differently to meet the needs of the growing number  
57  
58  
59  
60

1  
2  
3 of people with complex and long-term conditions, many of whom rely on care and  
4 support from different services.<sup>24</sup> An appropriate number of the multi-professional  
5 healthcare workforce is needed to deliver the required care.  
6  
7

8  
9 Although studies have suggested strategies, such as leadership initiatives<sup>23</sup>  
10 improvements in technology<sup>4,5</sup>, and incentives,<sup>25</sup> to address workforce recruitment  
11 and retention challenges, a gap still exists in the understanding of individual  
12 organisations' root cause of these deficiencies or insight as to how they relate to each  
13 other or how organisations go about implementing the appropriate strategies to  
14 manage and sustain the quality-of-care delivery.  
15  
16  
17  
18  
19

20  
21 Advancing an understanding of the elements that provide an environment for growth  
22 and job satisfaction among nurses and AHPs will inform innovative strategies to recruit  
23 and retain healthcare workers in the UK. In addressing this, the proposed study will  
24 adopt an exploratory mixed-method approach in investigating healthcare workforce  
25 recruitment and retention in two ICS in the East Anglia region of England. Partnering  
26 with local providers, Higher Education Institutions (HEIs), Health Education England  
27 (HEE), and nursing and AHPs staff, we will explore elements of organisational practice  
28 environments that contribute to workforce development, recruitment and retention in  
29 the Suffolk and North-East Essex (SNEE) ICS and the Norfolk and Waveney (NW)  
30 ICS.  
31  
32  
33  
34  
35  
36  
37  
38

### 39 *Research questions*

- 40  
41
- 42 • What factors affect healthcare workforce development, recruitment, and  
43 retention in the United Kingdom?
  - 44 • What elements of organisational practice environments are associated with the  
45 intention to take up employment in healthcare among newly qualified  
46 professionals in the East Anglia region?
  - 47 • What elements of organisational practice environments are associated with the  
48 retention of existing healthcare staff in the East Anglia region?
  - 49 • Can strengthening the partnership between HEIs, HEE, health and care service  
50 providers, NHS nursing and AHPs staff contribute to addressing practice  
51 environmental factors implicated in healthcare workforce recruitment and  
52 retention?  
53  
54  
55  
56  
57  
58  
59  
60

## METHODS

A sequential explanatory mixed methods design will be adopted in the proposed study. This involves an ordered combination of quantitative and qualitative research approaches to achieve a breadth and depth of understanding and corroboration/validation of results from both elements.<sup>26</sup> The methodological orientation for the mixed methods will be a quantitative survey → qualitative interviews; this order will advance an understanding of the mechanisms behind any association from the survey.

We systematically reviewed existing literature (research question (RQ) 1) to integrate findings on the factors that impact healthcare workforce development, recruitment and retention in the United Kingdom into the survey. The review results informed the adaptation of validated measurement instruments (questionnaires) for the survey.

While the survey will enable us to establish associations and patterns concerning organisational environments implicated in workforce development, recruitment and retention, the interviews will explain the associations, especially the mechanism of impact therein. In addition, the outcome of the survey will inform the qualitative investigation. For instance, the interview guides will be designed to include questions exploring significant associations from the statistical models. Also, unexpected patterns in the results (such as no significant association where expected, an opposite direction of the association, among others) will be further explored in the interviews to help interpret their meaning and importance.

For this study, newly qualified healthcare professionals will be used to refer to those within one year of employment post-qualification; healthcare professionals with more than one-year post-qualification experience in their area of practice will be referred to as established/retained.

### Phase 1: Quantitative strand

The quantitative strand will involve the analysis of primary data from a cross-sectional survey.

#### *Data*

1  
2  
3 An online survey will be launched in the second half of 2023 to collect data from newly  
4 qualified and established nurses and Allied Health professionals on organisational  
5 practice environments implicated in their job recruitment and retention. The survey link  
6 will be live for three weeks. The questionnaire will be hosted online at Questionpro<sup>27</sup>,  
7 restricting access to one response per device. The survey link will be primarily  
8 distributed through gatekeepers (practice educators working in organisations within  
9 the ICBs, these organisations will include: East Suffolk & North East Essex NHS  
10 Foundation Trust (ESNEFT), West Suffolk NHS Foundation Trust (WSFT), Norfolk &  
11 Norwich University NHS Foundation Trust (NNUHT), Norfolk & Suffolk Foundation  
12 Trust (NSFT), Norfolk Community Health and Care NHS Trust (NCH&C), and East  
13 Coast Community Healthcare (ECCH,)) via email correspondence. Reminders and  
14 constant communications with gatekeepers to follow up on non-responders will be  
15 used to reduce the risk of attrition bias in the survey.  
16  
17  
18  
19  
20  
21  
22  
23  
24  
25

### 26 *Measurement instrument*

27  
28  
29 Data for the survey will be collected using a questionnaire adapted from the validated  
30 instruments from existing studies on organisational culture, support mechanisms,  
31 placement cycle, supervisory capacity, compassionate pedagogy, transition to the  
32 registrant, and general infrastructure. Based on the preliminary review conducted so  
33 far, questionnaires will include items from the Turnover Intention Scale (TIS)<sup>28</sup> and the  
34 SCORE questionnaire: Assessment of your work setting Safety, Communication,  
35 Operational Reliability, and Engagement.<sup>29</sup> The SCORE survey assesses the  
36 perception of employees/employers about their organisation. It includes 73 items  
37 measuring 12 domains constituting three subscales: Safety Culture, Work-Balance,  
38 and Engagement and Burnout; the instrument has good internal reliability ranging from  
39  $\alpha=0.82$  to  $\alpha=0.94$ .  
40  
41  
42  
43  
44  
45  
46  
47  
48

49 TIS assesses employees' turnover intention by measuring 15 items, including  
50 statements about their frequency of seeking alternative jobs and considering leaving.  
51 The midpoint of the scale is 18 (3 x 6). If the total score is below 18, it indicates a  
52 desire to stay. If the scores are above 18, it suggests a desire to leave the organisation.  
53 Bothma and Roodt<sup>28</sup> reported a reliability coefficient of  $\alpha =0.80$  for the TIS.  
54  
55  
56  
57  
58  
59  
60

1  
2  
3 The adapted questionnaire for the proposed study, which contains 88 items, will be  
4 self-administered (see appendix 1 for a sample of the questionnaire). To ensure  
5 validity following adaptation, the questionnaire will be piloted using 10 participants who  
6 meet the inclusion criteria. These participants will be similar to the target participants  
7 for the survey. The pilot study will consider respondents' perception of the questions,  
8 question construct (including the appropriateness of the format and wording of  
9 questionnaires), and the questionnaire's ability to collect relevant data to answer  
10 research questions 2 and 3.  
11  
12  
13  
14  
15  
16

### 17 *Variables*

18  
19  
20 The predictors will be variables on opportunities for growth and advancement,  
21 workload, teamwork climate, participation in decision-making, and burnout climate (all  
22 Likert scale measures) as indicators of organisational practice environments. The  
23 outcome variables will differ for the separate models to test RQs 2&3. For RQ2, the  
24 outcomes will be variables on the intention of newly qualified healthcare practitioners  
25 to take up or stay in new employment; while for RQ3, the outcomes will include a  
26 continuous variable on the number of years established healthcare professionals have  
27 remained in employment/practice, intention to leave their current practice and job  
28 satisfaction. Confounders will include participant age, gender, ethnicity, qualification,  
29 area of practice, and geographical location.  
30  
31  
32  
33  
34  
35  
36  
37  
38

### 39 *Sample size calculation*

40  
41 We used G\*Power Software Package Program v3.1<sup>30</sup> to calculate the sample size.  
42 Calculations revealed that a minimum sample size of 64 for each group (AHPs and  
43 Nurses) was required (alpha 0.05, power 0.80 and an effect size 0.50) to achieve a  
44 statistically significant finding. However, we aim to exceed this number in each group  
45 to ensure statistical rigour. We will target a balanced number of newly qualified and  
46 established healthcare staff in our sample.  
47  
48  
49  
50  
51  
52

### 53 *Handling missing data*

54  
55 The rate of missing values in the dataset will be assessed to determine the pattern of  
56 missingness. Suppose values are missing at random (that is, participant  
57 characteristics do not determine missingness), we will conduct a multiple imputation  
58  
59  
60

1  
2  
3 to minimise bias and retain all observed values in the dataset.<sup>31</sup> Results will be  
4 averaged across ten imputed datasets.  
5  
6

### 7 *Statistical analysis*

8  
9  
10 To explore the relationships in RQs 2&3, we will conduct separate multi-level linear  
11 regression models for each outcome (newly qualified staff intention to stay and  
12 established staff retention) to explore their association with organisational practice  
13 environment measures (opportunities for growth and advancement, workload,  
14 teamwork climate, participation in decision-making, burnout climate), controlling for  
15 confounders (age, gender, ethnicity, qualification, area of practice, and geographical  
16 location). In addition, the multi-level model will account for the fact that healthcare  
17 professionals are nested within organisations, allowing the evaluation of between-  
18 and within-individual practitioner effects.  
19  
20  
21  
22  
23  
24  
25

26  
27 All analyses will be performed on Stata statistical software version SE 17.  
28  
29

### 30 *Sensitivity analysis*

31  
32 To ensure the imputation of missing values does not introduce bias in the dataset, a  
33 complete case analysis will be conducted to test for consistency with the results from  
34 the main analyses with the imputed dataset.  
35  
36  
37

### 38 **Phase 2: Qualitative strand**

39  
40  
41 In the qualitative strand, we will seek to understand organisational practice  
42 environment factors associated with the recruitment and retention of the health  
43 workforce. The interviews will explore the experiences and perspectives of newly  
44 qualified and established nurses, allied health professionals, and senior leaders within  
45 the NHS ICBs, including education and workforce. In addition, this phase will  
46 contribute to answering RQs 2&3 by advancing an understanding of the associations  
47 established in phase 1. Also, we will use the interviews to explore how to strengthen  
48 the partnership between HEIs, HEE, health and care service providers, NHS nursing  
49 and AHPs staff to address practice environmental factors implicated in healthcare  
50 workforce recruitment and retention (RQ3).  
51  
52  
53  
54  
55  
56  
57  
58

### 59 *Sampling technique and recruitment*

1  
2  
3 Newly qualified and established nurses, allied health professionals, and senior leaders  
4 within the NHS ICBs, including education and workforce leads with experiences  
5 relevant to the study, will be purposively sampled.<sup>32</sup> The characteristics of the interview  
6 participants will be informed by the survey results, ensuring those reporting specific  
7 experiences in the survey are interviewed for interpretation and clarification. The  
8 nurses and allied health professionals will be drawn from those who agreed to  
9 participate in the semi-structured interviews when they completed the initial  
10 questionnaire.

### 17 *Sample size*

20 To achieve content validity,<sup>33</sup> the sample size will be determined after the conduct of  
21 the interviews; the experiences and perspectives of participants will be explored until  
22 saturation is achieved.<sup>34</sup> However, given the likelihood of similarities in organisational  
23 practice environments shaping the experiences of staff and providers within the ICSs  
24 included in this study, we anticipate achieving saturation within 20 interviews.

### 29 *Data collection*

32 Semi-structured interviews will be conducted to explore and compare the experiences  
33 of healthcare professionals and senior leaders within different organisations on  
34 supporting, developing, securing and retaining the healthcare workforce. Given the  
35 sequential explanatory mixed methods design, interview questions cannot be finalised  
36 at this stage as these will depend on the survey results.

39 The interviews will be conducted in English via a virtual platform or face-to-face,  
40 depending on the participants' preferences, by three researchers (EA, NC and PA)  
41 with extensive experience in conducting qualitative interviews.

### 47 *Data analysis*

50 Interview audio records will be transcribed verbatim and analysed alongside any field  
51 notes using the thematic analysis method. Inductive coding and analysis will be  
52 conducted per Braun & Clarke's recommendations to generate key themes from the  
53 interview data.<sup>35</sup> With the inductive approach to coding, we expect emerging codes to  
54 be strongly related to the dataset, identifying new concepts and constructs therein.<sup>36</sup>

1  
2  
3 Themes will be developed from clusters of linked codes of similar construct and  
4 meaning. Codes will be considered for relevance and how they connect and interact  
5 with one another. The data will be interpreted at different levels: within and between  
6 individual interviews (data units). Emerging themes will be frequently discussed  
7 among the research team and collaborators in the project.  
8  
9

10  
11  
12 The NVivo software will be used to facilitate the interview data analysis.  
13

## 14 15 **DISCUSSION**

16  
17  
18 We will adopt an integrated interpretation of the quantitative and qualitative strands'  
19 results. Methodological triangulation and an integrated approach in discussing the  
20 proposed research results will provide a more in-depth understanding of study findings  
21 and clarify contrasting findings by discussing them comparatively.<sup>37</sup>  
22  
23

24  
25  
26 Studies of other populations have reported some organisational practice environment  
27 factors associated with securing and retaining the healthcare workforce. For example,  
28 a recent study in Ghana showed that the work practice environment, including nurse-  
29 physician relations and nurse-manager leadership, affected registered nurses'  
30 turnover intention, and the burnout level of nurses mediated this.<sup>38</sup> Smokrović et al.  
31 found that job satisfaction and absenteeism were the direct predictors of turnover  
32 intention in a Croatian registered nurse population.<sup>39</sup> They also showed that  
33 amotivation, identified regulation, intrinsic motivation, and nurse manager ability,  
34 leadership and support of nurses were indirect predictors of turnover intention  
35 mediated by job satisfaction. Another crucial organisational practice environment  
36 factor in workforce recruitment identified in the existing literature is support for newly  
37 qualified staff.<sup>40,41</sup> These findings demonstrate the need to understand how  
38 organisational practice environments shape staff experiences and employment  
39 decisions. Our proposed study will provide new insight into how region-specific  
40 organisational factors could affect the recruitment and retention of the health  
41 workforce.  
42  
43  
44  
45  
46  
47  
48  
49  
50  
51  
52  
53

54  
55 Based on our results, we will develop a conceptual framework to visually present the  
56 relationship pathways between the organisational practice environment and  
57 healthcare workforce development, recruitment and retention. The framework will  
58 show how organisational structures interact in influencing outcomes; this will be a  
59  
60

1  
2  
3 valuable resource for designing strategies to address current issues with the  
4 healthcare workforce in the East Anglia region.  
5  
6

### 7 *Ethics, data management and dissemination*

8  
9  
10 The proposed study has been approved by the University of Suffolk Research Ethics  
11 Committee (approval number RETH(S)22/051). Before participating in both phases  
12 of the study, participants will be provided with an information sheet, and written  
13 informed consent will be obtained. Confidentiality will be assured to all participants  
14 throughout the study. All data will be anonymised. Interview and survey data will be  
15 securely stored on a password-protected device accessible to only the research  
16 team. After five years following the final day of the study, all data copies will be  
17 securely deleted or shredded.  
18  
19

20  
21 While the project leadership and research governance will be undertaken by two  
22 authors who are experienced academic leads based at the University of Suffolk (PA  
23 and NC), strategic oversight will be provided by a steering group of workforce leaders  
24 across the SNEE and NW ICS'.  
25  
26

27  
28 Findings from our work will be disseminated through publications in peer-reviewed  
29 journals; presentations at stakeholders' events, professional and academic  
30 conferences; and short reports for stakeholders, including participating ICSs.  
31  
32

### 33 *Acknowledgments*

34  
35 We would like to acknowledge Health Education England and the steering committee  
36 members (Dr Paul Driscoll-Evans and Professor Lynne Wigens).  
37  
38

### 39 *Author contributions*

40  
41 Study Design: EA, PA, NB. Proposal Preparation: EA, PA, NB. Prior to submission,  
42 all authors read and have given approval for the final manuscript.  
43  
44

### 45 *Funding*

46  
47 This study was funded by Health Education England (RD22061).  
48  
49

### 50 *Competing Interest*

None declared.

### *Ethics Approval*

Ethical approval has been obtained through the University of Suffolk Research Ethics Committee (approval number: RETH(S)22/051). Findings from our work will be disseminated through publications in peer-reviewed journals; presentations at stakeholders' events, professional and academic conferences; and short reports for stakeholders, including participating ICSs.

### **References**

1. World Health Organization. Global strategy on human resources for health: Workforce 2030. (2016).
2. Zurn, P., Dolea, C. & Stilwell, B. Nurse retainment and recruitment: developing a motivated workforce. *The Global Nursing Review Initiative* (2005).
3. Brook, J., Aitken, L., Webb, R., MacLaren, J. & Salmon, D. Characteristics of successful interventions to reduce turnover and increase retainment of early career nurses: A systematic review. *International Journal of Nursing Studies* **91**, 47–59 (2019).
4. NHS. NHS Long Term Plan. (2019).
5. Alderwick, H. & Dixon, J. The NHS long term plan. *BMJ* **364**, l84 (2019).
6. NHS Improvement & NHS England. Allied health professions supporting patient flow: a quick guide. (2018).
7. Buchan, J., Charlesworth, A., Gershlick, B. & Seccombe, I. A critical moment: NHS staffing trends, retainment and attrition. *London: Health Foundation* (2019).
8. Health Education England. Growing nursing numbers: Literature review on nurses leaving the NHS. (2014).
9. Ford, M. 'Even more' nurses considering quitting the profession, survey reveals. *Nursing Times* (2020).
10. Bimpong, K. A. A., Khan, A., Slight, R., Tolley, C. L. & Slight, S. P. Relationship between labour force satisfaction, wages and retainment within the UK National Health Service: a systematic review of the literature. *BMJ Open* **10**, e034919 (2020).
11. Helm, T. & Ungood-Thomas, J. Nurses pledge tougher new strikes as NHS crisis deepens. *The Observer* (2022).
12. Erdem, H. & Lucey, D. R. Healthcare worker infections and deaths due to COVID-19: A survey from 37 nations and a call for WHO to post national data on their website. *International Journal of Infectious Diseases* **102**, 239–241 (2021).
13. Foye, U. *et al.* How has COVID-19 affected mental health nurses and the delivery of mental health nursing care in the UK? Results of a mixed-methods study. *Journal of Psychiatric and Mental Health Nursing* **28**, 126–137 (2021).
14. Wood, E. *et al.* UK advanced practice nurses' experiences of the COVID-19 pandemic: a mixed-methods cross-sectional study. *BMJ Open* **11**, e044139 (2021).

15. Department of Health and Social Care. Workforce Recruitment and Retainment Fund for adult social care. (2022).
16. House of Commons Health and Social Care Committee. Workforce: recruitment, training and retainment in health and social care. Third Report of Session 2022–23. (2022).
17. Audit Scotland. NHS in Scotland 2017. (2017).
18. Kapur, N. *et al.* Mental health service changes, organisational factors, and patient suicide in England in 1997–2012: a before-and-after study. *The Lancet Psychiatry* **3**, 526–534 (2016).
19. Salt, J., Cummings, G. G. & Profetto-McGrath, J. Increasing Retainment of New Graduate Nurses: A Systematic Review of Interventions by Healthcare Organizations. *JONA: The Journal of Nursing Administration* **38**, 287 (2008).
20. Zhang, Y., Qian, Y., Wu, J., Wen, F. & Zhang, Y. The effectiveness and implementation of mentoring program for newly graduated nurses: A systematic review. *Nurse Education Today* **37**, 136–144 (2016).
21. Wu, T.-Y., Fox, D. P., Stokes, C. & Adam, C. Work-related stress and intention to quit in newly graduated nurses. *Nurse Educ Today* **32**, 669–674 (2012).
22. Eckerson, C. M. The impact of nurse residency programs in the United States on improving retainment and satisfaction of new nurse hires: An evidence-based literature review. *Nurse Educ Today* **71**, 84–90 (2018).
23. Weurlander, M. *et al.* How do medical and nursing students experience emotional challenges during clinical placements? *Int J Med Educ* **9**, 74–82 (2018).
24. Kline, R. Leadership in the NHS. *BMJ Leader* **3**, (2019).
25. Saks, A. M. Antecedents and consequences of employee engagement. *Journal of Managerial Psychology* **21**, 600–619 (2006).
26. Creswell, J. W. & Clark, V. L. P. *Designing and conducting mixed methods research*. (Sage publications, 2017).
27. QuestionPro. Question Pro. <https://www.questionpro.com/blog/research-design/> (2023).
28. Bothma, C. F. C. & Roodt, G. The validation of the turnover intention scale : original research. *SA Journal of Human Resource Management* **11**, 1–12 (2013).
29. Sexton, J. B. *et al.* Providing feedback following Leadership WalkRounds is associated with better patient safety culture, higher employee engagement and lower burnout. *BMJ Qual Saf* **27**, 261–270 (2018).
30. Faul, F., Erdfelder, E., Lang, A.-G. & Buchner, A. G\*Power 3: A flexible statistical power analysis program for the social, behavioral, and biomedical sciences. *Behavior Research Methods* **39**, 175–191 (2007).
31. Allison, P. D. Missing data: Quantitative applications in the social sciences. *British Journal of Mathematical and Statistical Psychology* **55**, 193–196 (2002).
32. Bryman, A. *Social research methods*. (Oxford university press, 2016).
33. Fusch, P. & Ness, L. Are We There Yet? Data Saturation in Qualitative Research. *Walden Faculty and Staff Publications* **20**, (2015).
34. Guest, G., MacQueen, K. M. & Namey, E. E. *Applied thematic analysis*. (Sage Publications, 2011).
35. Braun, V. & Clarke, V. Using thematic analysis in psychology. *Qualitative research in psychology* **3**, 77–101 (2006).
36. Patton, M. Q. *Qualitative research & evaluation methods: Integrating theory and practice*. (Sage publications, 2014).
37. Mertens, D. M. & Hesse-Biber, S. Triangulation and Mixed Methods Research: Provocative Positions. *Journal of Mixed Methods Research* **6**, 75–79 (2012).

- 1  
2  
3 38. Poku, C. A., Donkor, E. & Naab, F. Impacts of Nursing Work Environment on  
4 Turnover Intentions: The Mediating Role of Burnout in Ghana. *Nurs Res Pract*  
5 **2022**, 1310508 (2022).  
6  
7 39. Smokrović, E. *et al.* A Conceptual Model of Nurses' Turnover Intention. *Int J*  
8 *Environ Res Public Health* **19**, 8205 (2022).  
9  
10 40. Jarden, R. J. *et al.* Registered Nurses' experiences of psychological well-being and  
11 ill-being in their first year of practice: A qualitative meta-synthesis. *Journal of*  
12 *Advanced Nursing* **77**, 1172–1187 (2021).  
13  
14 41. Freeman, M., Baumann, A., Akhtar-Danesh, N., Blythe, J. & Fisher, A.  
15 Employment goals, expectations, and migration intentions of nursing graduates in  
16 a Canadian border city: a mixed methods study. *Int J Nurs Stud* **49**, 1531–1543  
17 (2012).  
18  
19  
20  
21  
22  
23  
24  
25  
26  
27  
28  
29  
30  
31  
32  
33  
34  
35  
36  
37  
38  
39  
40  
41  
42  
43  
44  
45  
46  
47  
48  
49  
50  
51  
52  
53  
54  
55  
56  
57  
58  
59  
60

# BMJ Open

## Investigating healthcare workforce recruitment and retention: A mixed methods study protocol

|                                 |                                                                                                                                                          |
|---------------------------------|----------------------------------------------------------------------------------------------------------------------------------------------------------|
| Journal:                        | <i>BMJ Open</i>                                                                                                                                          |
| Manuscript ID                   | bmjopen-2023-074100.R1                                                                                                                                   |
| Article Type:                   | Protocol                                                                                                                                                 |
| Date Submitted by the Author:   | 24-Oct-2023                                                                                                                                              |
| Complete List of Authors:       | Alkan, Erkan; University of Suffolk<br>Cushen-Brewster, Noreen; University of Suffolk<br>Anyanwu, Philip; University of Suffolk                          |
| <b>Primary Subject Heading</b>: | Health services research                                                                                                                                 |
| Secondary Subject Heading:      | Nursing                                                                                                                                                  |
| Keywords:                       | Health policy < HEALTH SERVICES ADMINISTRATION & MANAGEMENT, Nursing Care, Organisation of health services < HEALTH SERVICES ADMINISTRATION & MANAGEMENT |
|                                 |                                                                                                                                                          |

SCHOLARONE™  
Manuscripts

# Investigating healthcare workforce recruitment and retention: A mixed methods study protocol

Erkan Alkan<sup>1\*</sup>, Noreen Cushen-Brewster<sup>1</sup>, Philip Anyanwu<sup>1</sup>

<sup>1</sup> Institute of Health and Well-being, University of Suffolk, Ipswich, UK

\*Corresponding Author, Full Address: Institute of Health and Well-being, University of Suffolk, Waterfront Building, 19 Neptune Quay, Ipswich IP4 1QJ, UK, phone: +441473338357, email: e.alkan@uos.ac.uk

Noreen Cushen-Brewster: email: n.cushen-brewster2@uos.ac.uk

Philip Anyanwu: email: p.anyanwu2@uos.ac.uk

## Abstract

**Introduction:** Although the sustainability of the health workforce has been identified as essential to achieving health and wider development objectives, challenges with securing and retaining the healthcare workforce persist. In the UK, there are notable shortages across a wide range of National Health Service (NHS) staff groups, with a high staff turnover indicating retention issues in the healthcare workforce. In addition, gaps exist in understanding the root cause of individual organisation's workforce deficiencies and how their practice environment factors interact to impact workforce recruitment and retention.

**Methods and analysis:** An exploratory mixed-methods approach will be conducted to investigate the impact of organisational practice environment factors on healthcare workforce recruitment and retention in two Integrated Care Systems (ICS) in the East of England. We will conduct an online survey of newly qualified and established nurses and allied health professionals using a questionnaire adapted from two validated instruments. Multi-level linear regression models will be fitted to evaluate the association between organisational practice environmental factors and staff recruitment and retention. The qualitative interviews will explore the experiences and perspectives of staff and senior leaders to explain the survey results and any significant associations therein. Also, the interviews will explore how to strengthen the partnership between higher education institutions, Health Education England, health

1  
2  
3 and care service providers, NHS nursing and allied health professional staff to  
4 enhance recruiting and retaining staff. An exploratory inductive coding and analysis  
5 will follow Braun and Clarke's recommendations to generate key themes from  
6 transcribed interview data.  
7  
8  
9

10  
11 **Ethics and dissemination:** Ethical approval has been obtained through the University  
12 of Suffolk Research Ethics Committee (approval number: RETH(S)22/051). Findings  
13 from our work will be disseminated through publications in peer-reviewed journals;  
14 presentations at stakeholders' events, professional and academic conferences; and  
15 short reports for stakeholders, including participating ICSs.  
16  
17  
18  
19

20  
21 **Keywords:** health-workforce, organisational aspect, turnover, retention, recruitment  
22

23 **Word Count:** 2977  
24  
25

### 26 **Strengths and limitations of this study**

27

- 28  
29 • This study will provide new insight into the relationship between turnover  
30 intention and organisational practice environment in nurses and allied health  
31 professionals in the East Anglia region.
- 32  
33 • The study combines qualitative and quantitative research methods to gain a  
34 grounded, multifaceted perspective on the issue of workforce recruitment and  
35 retention.  
36  
37
- 38  
39 • By including healthcare workers and senior leaders, our study will approach the  
40 organisational practice environment issues from different perspectives.  
41  
42
- 43  
44 • Due to the scope of the research, the study sample will be limited to the East  
45 of England. Including participants from other regions may provide a more  
46 representative perspective of healthcare workforce issues in England. One  
47 limitation of our proposed study is its exclusive focus on nurses and allied health  
48 professionals. This limitation arises because the experiences and practice  
49 environment factors affecting doctors and other healthcare professionals may  
50 differ. However, it's important to note that our findings will remain highly relevant  
51 to the broader UK healthcare workforce, as nurses and allied health  
52 professionals constitute a significant majority (38.48%) of the workforce.  
53  
54  
55  
56  
57  
58  
59  
60

## INTRODUCTION

Appropriate staffing and skill mix are crucial determinants of performance and quality in healthcare delivery. Although the sustainability of the health workforce has been identified as essential to achieving health and wider development objectives(1), a challenge with securing and retaining the healthcare workforce persists globally (2). Countries at all socioeconomic development levels face workforce development, recruitment, and retention issues (1). Evidence from European countries, including the UK, suggests an increase in healthcare staff quitting their posts, from 5% to 17%, over three years (3). In the UK, a high staff turnover, an indicator of retention issues in the healthcare workforce, persists (2).

There are notable shortages across a wide range of National Health Service (NHS) staff groups in the UK; the most challenging include nurses and allied health professionals (AHPs), who are critical to delivering aspirations for 21st-century care set out in the NHS Long-Term Plan (4,5). AHPs are a diverse group of professionals who provide various high-quality care across health and social care pathways. About 230,000 AHPs in 14 professions (including paramedics, physiotherapists, occupational therapists, and dieticians, among others) worked independently across the spectrum of care from primary to specialist care provision in the UK in 2021 (6). Recently, there has been a decline in previous achievements to increase the FTE number of allied health professionals in the UK (7). A similar trend is seen across the NHS workforce, including the nursing staff.

The Nursing and Midwifery Council's register recorded that 6.5% of nurses left the register between 2012 and 2013 (8). Most of those who left were of active service age; only 1.2% of registered nurses left due to retirement. However, nurses quitting rates may be underreported given that some leave work while still registered, and some take up shift jobs within the NHS away from direct clinical care (9).

Studies have identified structural factors implicated in nurses/AHP workforce recruitment and retention. For instance, pay level has been reported as important in nurses/AHP workforce retention (10). An interplay exists between the cost of living and nurses/AHP workforce recruitment and retention in the UK. For example, the Royal College of Nursing members in England, Northern Ireland and Wales held strike

1  
2  
3 actions in late 2022 and early 2023 on pay dispute, worsened by the current cost of  
4 living crisis (11).  
5  
6

7 Evidence from UK studies suggests that the COVID-19 pandemic further exacerbated  
8 nurses/AHP workforce recruitment and retention issues. COVID-19 infection among  
9 frontline staff, difficult working conditions, increased workload, and burnout are  
10 reported COVID-19-related factors exacerbating healthcare workforce challenges  
11 (12–14).  
12  
13  
14  
15  
16

17 Despite the focus and investment by the Department of Health and Social Care in the  
18 workforce(15,16), there remain considerable challenges in filling the roles required  
19 across both sectors to meet the demands. Many approaches have been explored to  
20 provide the most appropriate solutions; however, overwhelming challenges must be  
21 overcome to improve staff retention across Integrated Care Systems.  
22  
23  
24  
25  
26

27 Recruitment and retention issues affect different aspects of health and care services.  
28 A high turnover and shortage of nurses and AHPs impact care quality, patient  
29 outcomes, and the cost of healthcare delivery (2,17,18). Studies have shown that a  
30 crucial time for the turnover of nurses is during the first year post-qualification  
31 (3,19,20). Psychological issues, including anxiety and stress due to work pressure in  
32 the early days of work, are common reasons for quitting among newly qualified nurses  
33 (NQNs) (21). Some studies suggest that professionals, such as nurses, often feel ill-  
34 prepared for their roles and quit their profession; lack of self-confidence has been  
35 implicated in performance rate, stress levels, and the difference between expectations  
36 and reality (22). Negative experiences during clinical placements, such as a safe  
37 learning environment and lack of health and well-being support from colleagues, can  
38 also influence NQNs negatively (23). Understanding the organisational practice  
39 environment importance in NQNs' decision on employment within the sector is  
40 essential in reducing turnover and increasing retention.  
41  
42  
43  
44  
45  
46  
47  
48  
49  
50  
51

52 Compared to retention, there is a lack of studies focusing on the factors affecting the  
53 recruitment of nurses and AHPs. These few studies mostly focus on international  
54 recruitment. For instance, according to a report by Nuffield Trust, the pull factors for  
55 moving and working as a nurse in the UK include better pay, career opportunities,  
56 improved working conditions, and long-term financial stability (24). In terms of factors  
57  
58  
59  
60

1  
2  
3 affecting the recruitment of AHPs, a scoping review revealed that the opportunity to  
4 help people was a key motivation compared to financially based motivations. The  
5 same study also identified the lack of awareness of the profession as the main barrier  
6 to choosing a career in AHP (25).  
7  
8  
9

10  
11 With the emergence of integrated care systems (ICS) in England, there is an  
12 increasing need to upskill and consolidate services across systems to provide  
13 enhanced integration of health and social care rather than just individual institutions  
14 (26). In addition, given the unprecedented challenges facing the NHS, systems need  
15 healthcare professionals to work differently to meet the needs of the growing number  
16 of people with complex and long-term conditions, many of whom rely on care and  
17 support from different services (26). An appropriate number of the multi-professional  
18 healthcare workforce is needed to deliver the required care.  
19  
20  
21  
22  
23  
24  
25

26 Although studies have suggested strategies, such as leadership initiatives (27)  
27 improvements in technology (28), and incentives (29), to address workforce  
28 recruitment and retention challenges, a gap still exists in the understanding of  
29 individual organisations' root cause of these deficiencies or insight as to how they  
30 relate to each other or how organisations go about implementing the appropriate  
31 strategies to manage and sustain the quality-of-care delivery.  
32  
33  
34  
35  
36

37 Advancing an understanding of the elements that provide an environment for growth  
38 and job satisfaction among nurses and AHPs will inform innovative strategies to recruit  
39 and retain healthcare workers in the UK. In addressing this, the proposed study will  
40 adopt an exploratory mixed-method approach in investigating healthcare workforce  
41 recruitment and retention in two ICS in the East Anglia region of England. Partnering  
42 with local providers, Higher Education Institutions (HEIs), NHS, and nursing and AHPs  
43 staff, we will explore elements of organisational practice environments that contribute  
44 to recruitment and retention in the Suffolk and North-East Essex (SNEE) ICS and the  
45 Norfolk and Waveney (NW) ICS.  
46  
47  
48  
49  
50  
51  
52

### 53 *Research questions*

- 54 • What factors affect healthcare recruitment, and retention in the United  
55 Kingdom?  
56  
57  
58  
59  
60

- What elements of organisational practice environments are associated with the intention to take up employment in healthcare among newly qualified professionals in the East Anglia region?
- What elements of organisational practice environments are associated with the retention of existing healthcare staff in the East Anglia region?
- Can strengthening the partnership between HEIs, NHS, health and care service providers, NHS nursing and AHPs staff contribute to addressing practice environmental factors implicated in healthcare workforce recruitment and retention?

## METHODS

A sequential explanatory mixed methods design will be adopted in the proposed study. This involves an ordered combination of quantitative and qualitative research approaches to achieve a breadth and depth of understanding and corroboration/validation of results from both elements (30). The methodological orientation for the mixed methods will be a quantitative survey → qualitative interviews; this order will advance an understanding of the mechanisms behind any association from the survey.

We systematically reviewed existing literature (research question (RQ) 1) to integrate findings on the factors that impact healthcare recruitment and retention in the United Kingdom into the survey. The review results informed the adaptation of validated measurement instruments (questionnaires) for the survey.

While the survey will enable us to establish associations and patterns concerning organisational environments implicated in recruitment and retention, the interviews will explain the associations, especially the mechanism of impact therein. In addition, the outcome of the survey will inform the qualitative investigation. For instance, the interview guides will be designed to include questions exploring significant associations from the statistical models. Also, unexpected patterns in the results (such as no significant association where expected, an opposite direction of the association, among others) will be further explored in the interviews to help interpret their meaning and importance.

1  
2  
3 For this study, newly qualified healthcare professionals will be used to refer to those  
4 within one year of employment post-qualification; healthcare professionals with more  
5 than one-year post-qualification experience in their area of practice will be referred to  
6 as established/retained.  
7  
8  
9

### 10 11 **Phase 1: Quantitative strand**

12  
13  
14 The quantitative strand will involve the analysis of primary data from a cross-sectional  
15 survey.  
16

#### 17 18 *Data*

19  
20  
21 An online survey will be launched in the second half of 2023 to collect data from newly  
22 qualified and established nurses and Allied Health professionals on organisational  
23 practice environments implicated in their job recruitment and retention. The survey link  
24 will be live for three weeks. The questionnaire will be hosted online at Questionpro  
25 (31), restricting access to one response per device. The survey link will be primarily  
26 distributed through gatekeepers (practice educators working in organisations within  
27 Suffolk and North East Essex, and Norfolk and Waveney Integrated Care Boards  
28 (ICBs), these organisations will include: East Suffolk & North East Essex NHS  
29 Foundation Trust (ESNEFT), West Suffolk NHS Foundation Trust (WSFT), Norfolk &  
30 Norwich University NHS Foundation Trust (NNUHT), Norfolk & Suffolk Foundation  
31 Trust (NSFT), Norfolk Community Health and Care NHS Trust (NCH&C), and East  
32 Coast Community Healthcare (ECCH)) via email correspondence. Reminders and  
33 constant communications with gatekeepers to follow up on non-responders will be  
34 used to reduce the risk of attrition bias in the survey.  
35  
36  
37  
38  
39  
40  
41  
42  
43  
44  
45

#### 46 47 *Measurement instrument*

48  
49 Data for the survey will be collected using a questionnaire adapted from the validated  
50 instruments from existing studies on organisational practice environment, support  
51 mechanisms, placement cycle, supervisory capacity, compassionate pedagogy,  
52 transition to the registrant, and general infrastructure. Based on the preliminary review  
53 conducted so far, questionnaires will include items from the Turnover Intention Scale  
54 (TIS) (32) and the SCORE questionnaire: Assessment of your work setting Safety,  
55 Communication, Operational Reliability, and Engagement (33). The SCORE survey  
56  
57  
58  
59  
60

1  
2  
3 assesses the perception of employees/employers about their organisation. It includes  
4 73 items measuring 12 domains constituting three subscales: Safety Culture, Work-  
5 Balance, and Engagement and Burnout; the instrument has good internal reliability  
6 ranging from  $\alpha=0.82$  to  $\alpha=0.94$ .  
7  
8  
9

10  
11 TIS assesses employees' turnover intention by measuring 15 items, including  
12 statements about their frequency of seeking alternative jobs and considering leaving.  
13 The midpoint of the scale is 18 (3 x 6). If the total score is below 18, it indicates a  
14 desire to stay. If the scores are above 18, it suggests a desire to leave the organisation.  
15 Bothma and Roodt (32) reported a reliability coefficient of  $\alpha =0.80$  for the TIS.  
16  
17  
18

19  
20 These scales have been used in the field of organisational psychology to show the  
21 relationship between turnover intention and job satisfaction, organisational  
22 commitment, and social support (34–36). We obtained written permissions to use both  
23 scales from the developers.  
24  
25  
26  
27

28  
29 The adapted questionnaire for the proposed study, which contains 88 items, will be  
30 self-administered (see appendix 1 for a sample of the questionnaire). To ensure  
31 validity following adaptation, the questionnaire will be piloted using 10 participants who  
32 meet the inclusion criteria. These participants will be similar to the target participants  
33 for the survey. The pilot study will consider respondents' perception of the questions,  
34 question construct (including the appropriateness of the format and wording of  
35 questionnaires), and the questionnaire's ability to collect relevant data to answer  
36 research questions 2 and 3.  
37  
38  
39  
40  
41  
42

### 43 *Variables*

44  
45  
46 The predictors will be variables on opportunities for growth and advancement,  
47 workload, teamwork climate, participation in decision-making, and burnout climate (all  
48 Likert scale measures) as indicators of organisational practice environments. The  
49 outcome variables will differ for the separate models to test RQs 2&3. For RQ2, the  
50 outcomes will be variables on the intention of newly qualified healthcare practitioners  
51 to take up or stay in new employment; while for RQ3, the outcomes will include a  
52 continuous variable on the number of years established healthcare professionals have  
53 remained in employment/practice, intention to leave their current practice and job  
54  
55  
56  
57  
58  
59  
60

1  
2  
3 satisfaction. Confounders will include participant age, gender, ethnicity, qualification,  
4 area of practice, and geographical location.  
5  
6

### 7 *Sample size calculation*

8  
9  
10 We used the formula below to calculate the sample size of 374 for the survey (37,38).  
11 We will target to achieve a balanced number of newly qualified and established nurses  
12 and AHPs in our sample.  
13  
14  
15

$$16 \text{ Sample size} = \frac{N * X}{X + N - 1}$$

17  
18 Where:  $X = Z_{\alpha/2}^2 * P (1 - P) / MOE^2$

19  
20 P=Proportion of sample

21  
22 MOE= Margin of error

23  
24 N=Population size (using 14395 as the estimated population of nurses and AHPs in the target  
25 organisations within the two ICBs as at the first quarter of 2023)(39,40)

26  
27  $Z_{-(\alpha/2)} = 1.96$   
28  
29

### 30 *Handling missing data*

31  
32 The rate of missing values in the dataset will be assessed to determine the pattern of  
33 missingness. Suppose values are missing at random (that is, participant  
34 characteristics do not determine missingness), we will conduct a multiple imputation  
35 to minimise bias and retain all observed values in the dataset (41). Results will be  
36 averaged across ten imputed datasets.  
37  
38  
39  
40

### 41 *Statistical analysis*

42  
43 To explore the relationships in RQs 2&3, we will conduct separate multi-level linear  
44 regression models for each outcome (newly qualified staff intention to stay and  
45 established staff retention) to explore their association with organisational practice  
46 environment measures (opportunities for growth and advancement, workload,  
47 teamwork climate, participation in decision-making, burnout climate), controlling for  
48 confounders (age, gender, ethnicity, qualification, area of practice, and geographical  
49 location). In addition, the multi-level model will account for the fact that healthcare  
50 professionals are nested within organisations, allowing the evaluation of between-  
51  
52  
53  
54  
55  
56  
57  
58  
59  
60

1  
2  
3 and within-individual practitioner effects. We will perform Bonferroni corrections by  
4 dividing alpha-level by the number of comparisons.  
5  
6

7 All analyses will be performed on Stata statistical software version SE 17.  
8  
9

### 10 *Sensitivity analysis*

11  
12

13 To ensure the imputation of missing values does not introduce bias in the dataset, a  
14 complete case analysis will be conducted to test for consistency with the results from  
15 the main analyses with the imputed dataset.  
16  
17

### 18 **Phase 2: Qualitative strand**

19  
20

21 In the qualitative strand, we will seek to understand organisational practice  
22 environment factors associated with the recruitment and retention of the health  
23 workforce. The interviews will explore the experiences and perspectives of newly  
24 qualified and established nurses, allied health professionals, and senior leaders within  
25 the NHS ICBs, including education and workforce. In addition, this phase will  
26 contribute to answering RQs 2&3 by advancing an understanding of the associations  
27 established in phase 1. Also, we will use the interviews to explore how to strengthen  
28 the partnership between HEIs, NHS England, health and care service providers, NHS  
29 nursing and AHPs staff to address practice environmental factors implicated in  
30 healthcare workforce recruitment and retention (RQ3).  
31  
32  
33  
34  
35  
36  
37  
38

### 39 *Sampling technique and recruitment*

40  
41  
42

43 Newly qualified and established nurses, allied health professionals, and senior leaders  
44 within the NHS ICBs, including education and workforce leads with experiences  
45 relevant to the study, will be purposively sampled (42). We will recruit newly qualified  
46 staff members which will help us to better understand the experience of transition from  
47 a student (pre-employment) to employment. The characteristics of the interview  
48 participants will be informed by the survey results, ensuring those reporting specific  
49 experiences in the survey are interviewed for interpretation and clarification. The  
50 nurses and allied health professionals will be drawn from those who agreed to  
51 participate in the semi-structured interviews when they completed the initial  
52 questionnaire.  
53  
54  
55  
56  
57  
58  
59  
60

### *Sample size*

To achieve content validity (43), the sample size will be determined after the conduct of the interviews; the experiences and perspectives of participants will be explored until saturation is achieved (44). We anticipate achieving saturation within 11 interviews.

### *Data collection*

Semi-structured interviews will be conducted to explore and compare the experiences of healthcare professionals and senior leaders within different organisations on supporting, developing, securing and retaining the healthcare workforce. Given the sequential explanatory mixed methods design, interview questions cannot be finalised at this stage as these will depend on the survey results.

The interviews will be conducted in English via a virtual platform or face-to-face, depending on the participants' preferences, by three researchers (EA, NC and PA) with extensive experience in conducting qualitative interviews.

### *Data analysis*

Interview audio records will be transcribed verbatim and analysed alongside any field notes using the thematic analysis method. Inductive coding and analysis will be conducted per Braun & Clarke's recommendations to generate key themes from the interview data (45). With the inductive approach to coding, we expect emerging codes to be strongly related to the dataset, identifying new concepts and constructs therein (46). Themes will be developed from clusters of linked codes of similar construct and meaning. Codes will be considered for relevance and how they connect and interact with one another. The data will be interpreted at different levels: within and between individual interviews (data units). Emerging themes will be frequently discussed among the research team and collaborators in the project. To ensure trustworthiness and rigour of the data collection, we will share the raw transcripts with the participants and seek their feedback to validate the accuracy and interpretation of their responses. We will use a thematic analysis framework developed by Richie and Spencer (47) at the national centre for social research UK to critically examine and code the data which will provide multiple perspectives to be considered and help ensure the accuracy of

our interpretations (48). Finally, we will maintain consistency in coding by establishing clear definitions, and regular team meetings to resolve coding discrepancies.

Planned Start and End Dates: July 2023- to June 2023

### **Patient and Public Involvement**

None

### **DISCUSSION**

We will adopt an integrated interpretation of the quantitative and qualitative strands' results. Methodological triangulation and an integrated approach in discussing the proposed research results will provide a more in-depth understanding of study findings and clarify contrasting findings by discussing them comparatively (49).

Studies of other populations have reported some organisational practice environment factors associated with securing and retaining the healthcare workforce. For example, a recent study in Ghana showed that the work practice environment, including nurse-physician relations and nurse-manager leadership, affected registered nurses' turnover intention, and the burnout level of nurses mediated this (50). Smokrović et al. found that job satisfaction and absenteeism were the direct predictors of turnover intention in a Croatian registered nurse population (51). They also showed that amotivation, identified regulation, intrinsic motivation, and nurse manager ability, leadership and support of nurses were indirect predictors of turnover intention mediated by job satisfaction. Another crucial organisational practice environment factor in workforce recruitment identified in the existing literature is support for newly qualified staff (52,53). These findings demonstrate the need to understand how organisational practice environments shape staff experiences and employment decisions. Our proposed study will provide new insight into how region-specific organisational factors could affect the recruitment and retention of the health workforce.

Based on our results, we will develop a conceptual framework to visually present the relationship pathways between the organisational practice environment and healthcare recruitment and retention. The framework will show how organisational

1  
2  
3 structures interact in influencing outcomes; this will be a valuable resource for  
4 designing strategies to address current issues with the healthcare workforce in the  
5 East Anglia region.  
6  
7

### 8 9 *Ethics, data management and dissemination*

10  
11  
12 The proposed study has been approved by the University of Suffolk Research Ethics  
13 Committee (approval number RETH(S)22/051). Before participating in both phases  
14 of the study, participants will be provided with an information sheet, and written  
15 informed consent will be obtained. Confidentiality will be assured to all participants  
16 throughout the study. All data will be anonymised. Interview and survey data will be  
17 securely stored on a password-protected device accessible to only the research  
18 team. After five years following the final day of the study, all data copies will be  
19 securely deleted or shredded.  
20  
21  
22  
23  
24  
25

26  
27 While the project leadership and research governance will be undertaken by two  
28 authors who are experienced academic leads based at the University of Suffolk (PA  
29 and NC), strategic oversight will be provided by a steering group of workforce leaders  
30 across the SNEE and NW ICS'.  
31  
32  
33

34  
35 Findings from our work will be disseminated through publications in peer-reviewed  
36 journals; presentations at stakeholders' events, professional and academic  
37 conferences; and short reports for stakeholders, including participating ICSs.  
38  
39

40  
41 Our study does not require an Integrated Research Application System/Health  
42 Research Authority (IRAS/HRA) approval as it primarily involves interviews and  
43 surveys with NHS staff which does not include any clinical interventions, patient data,  
44 or direct access to patient records. On the contrary, our focus is on the staff's  
45 experience working in healthcare organisations. Given the non-clinical nature of our  
46 study and the absence of patient-related data, our research is considered low risk  
47 and falls within the category of service evaluations or staff-related studies, which  
48 typically do not require IRAS/HRA approval. In addition, we have also run the "Do I  
49 need NHS REC review algorithm" with details of our study, and the system also  
50 confirmed that an NHS ethics approval is not needed for the study.  
51  
52  
53  
54  
55  
56  
57

### 58 59 *Acknowledgments*

60

We would like to acknowledge Health Education England and the steering committee members (Dr Paul Driscoll-Evans, Mr Graham Seward and Professor Lynne Wiggins).

### *Author contributions*

Study Design: EA, PA, NB. Proposal Preparation: EA, PA, NB. Prior to submission, all authors read and have given approval for the final manuscript.

### *Funding*

This study was funded initially by Health Education England (RD22061) now merged with NHS England.

### *Competing Interest*

None declared.

### *Ethics Approval*

Ethical approval has been obtained through the University of Suffolk Research Ethics Committee (approval number: RETH(S)22/051). Findings from our work will be disseminated through publications in peer-reviewed journals; presentations at stakeholders' events, professional and academic conferences; and short reports for stakeholders, including participating ICSs.

## **References**

1. World Health Organization. Global strategy on human resources for health: Workforce 2030 [Internet]. 2016 [cited 2023 Jan 12]. Available from: file:///C:/Users/e1005260/Downloads/9789241511131-eng.pdf
2. Zurn P, Dolea C, Stilwell B. Nurse retention and recruitment: developing a motivated workforce. The Global Nursing Review Initiative [Internet]. 2005 Jan 1;(4). Available from: file:///C:/Users/e1005260/Downloads/Nurse\_Retention\_and\_Recruitment\_Developing\_a\_Motiv.pdf
3. Brook J, Aitken L, Webb R, MacLaren J, Salmon D. Characteristics of successful interventions to reduce turnover and increase retention of early career nurses: A systematic review. *International Journal of Nursing Studies*. 2019 Mar 1;91:47–59.

- 1
- 2
- 3
- 4 4. NHS. NHS Long Term Plan [Internet]. NHS; 2019 [cited 2023 Jan 13]. Available from:  
5 [https://www.longtermplan.nhs.uk/wp-content/uploads/2019/08/nhs-long-term-plan-](https://www.longtermplan.nhs.uk/wp-content/uploads/2019/08/nhs-long-term-plan-version-1.2.pdf)  
6 [version-1.2.pdf](https://www.longtermplan.nhs.uk/wp-content/uploads/2019/08/nhs-long-term-plan-version-1.2.pdf)
- 7
- 8 5. Alderwick H, Dixon J. The NHS long term plan. *BMJ*. 2019 Jan 7;364:l84.
- 9
- 10 6. NHS Improvement, NHS England. Allied health professions supporting patient flow: a  
11 quick guide [Internet]. 2018 [cited 2023 Jan 13]. Available from:  
12 [https://webarchive.nationalarchives.gov.uk/ukgwa/20210415190705/https://improvem-](https://webarchive.nationalarchives.gov.uk/ukgwa/20210415190705/https://improvement.nhs.uk/resources/allied-health-professions-ahps-supporting-patient-flow/)  
13 [ent.nhs.uk/resources/allied-health-professions-ahps-supporting-patient-flow/](https://webarchive.nationalarchives.gov.uk/ukgwa/20210415190705/https://improvement.nhs.uk/resources/allied-health-professions-ahps-supporting-patient-flow/)  
14
- 15
- 16 7. Buchan J, Charlesworth A, Gershlick B, Seccombe I. A critical moment: NHS staffing trends,  
17 retention and attrition. London: Health Foundation. 2019;
- 18
- 19 8. Health Education England. Growing nursing numbers: Literature review on nurses leaving  
20 the NHS. 2014;
- 21
- 22 9. Ford M. 'Even more' nurses considering quitting the profession, survey reveals. *Nursing*  
23 *Times* [Internet]. 2020 Jul 17 [cited 2023 Jan 13]; Available from:  
24 [https://www.nursingtimes.net/news/workforce/even-more-nurses-considering-](https://www.nursingtimes.net/news/workforce/even-more-nurses-considering-quitting-the-profession-survey-reveals-17-07-2020/)  
25 [quitting-the-profession-survey-reveals-17-07-2020/](https://www.nursingtimes.net/news/workforce/even-more-nurses-considering-quitting-the-profession-survey-reveals-17-07-2020/)  
26
- 27
- 28 10. Bimpong KAA, Khan A, Slight R, Tolley CL, Slight SP. Relationship between labour force  
29 satisfaction, wages and retention within the UK National Health Service: a systematic  
30 review of the literature. *BMJ Open*. 2020 Jul 21;10(7):e034919.
- 31
- 32 11. Helm T, Ungoed-Thomas J. Nurses pledge tougher new strikes as NHS crisis deepens. *The*  
33 *Observer* [Internet]. 2022 Dec 17 [cited 2023 Jan 13]; Available from:  
34 [https://www.theguardian.com/society/2022/dec/17/nurses-pledge-tougher-new-](https://www.theguardian.com/society/2022/dec/17/nurses-pledge-tougher-new-strikes-as-nhs-crisis-deepens)  
35 [strikes-as-nhs-crisis-deepens](https://www.theguardian.com/society/2022/dec/17/nurses-pledge-tougher-new-strikes-as-nhs-crisis-deepens)  
36
- 37
- 38 12. Erdem H, Lucey DR. Healthcare worker infections and deaths due to COVID-19: A survey  
39 from 37 nations and a call for WHO to post national data on their website. *International*  
40 *Journal of Infectious Diseases*. 2021 Jan 1;102:239–41.
- 41
- 42 13. Foye U, Dalton-Locke C, Harju-Seppänen J, Lane R, Beames L, Vera San Juan N, et al. How  
43 has COVID-19 affected mental health nurses and the delivery of mental health nursing  
44 care in the UK? Results of a mixed-methods study. *Journal of Psychiatric and Mental*  
45 *Health Nursing*. 2021;28(2):126–37.
- 46
- 47 14. Wood E, King R, Senek M, Robertson S, Taylor B, Tod A, et al. UK advanced practice nurses'  
48 experiences of the COVID-19 pandemic: a mixed-methods cross-sectional study. *BMJ*  
49 *Open*. 2021 Mar 1;11(3):e044139.
- 50
- 51 15. Department of Health and Social Care. Workforce Recruitment and Retention Fund for  
52 adult social care [Internet]. Department of Health and Social Care; 2022. Available from:  
53 [https://www.gov.uk/government/publications/workforce-recruitment-and-retention-](https://www.gov.uk/government/publications/workforce-recruitment-and-retention-fund-for-adult-social-care/workforce-recruitment-and-retention-fund-for-adult-social-care)  
54 [fund-for-adult-social-care/workforce-recruitment-and-retention-fund-for-adult-social-](https://www.gov.uk/government/publications/workforce-recruitment-and-retention-fund-for-adult-social-care/workforce-recruitment-and-retention-fund-for-adult-social-care)  
55 [care](https://www.gov.uk/government/publications/workforce-recruitment-and-retention-fund-for-adult-social-care/workforce-recruitment-and-retention-fund-for-adult-social-care)  
56
- 57
- 58
- 59
- 60

16. House of Commons Health and Social Care Committee. Workforce: recruitment, training and retention in health and social care. Third Report of Session 2022–23 [Internet]. 2022. Available from: [chrome-extension://efaidnbnmnibpcjpcglclefindmkaj/https://committees.parliament.uk/publications/23246/documents/171671/default/](https://committees.parliament.uk/publications/23246/documents/171671/default/)
17. Audit Scotland. NHS in Scotland 2017 [Internet]. 2017. Available from: <https://www.audit-scotland.gov.uk/publications/nhs-in-scotland-2017>
18. Kapur N, Ibrahim S, While D, Baird A, Rodway C, Hunt IM, et al. Mental health service changes, organisational factors, and patient suicide in England in 1997–2012: a before-and-after study. *The Lancet Psychiatry*. 2016 Jun 1;3(6):526–34.
19. Salt J, Cummings GG, Profetto-McGrath J. Increasing Retention of New Graduate Nurses: A Systematic Review of Interventions by Healthcare Organizations. *JONA: The Journal of Nursing Administration*. 2008 Jun;38(6):287.
20. Zhang Y, Qian Y, Wu J, Wen F, Zhang Y. The effectiveness and implementation of mentoring program for newly graduated nurses: A systematic review. *Nurse Education Today*. 2016 Feb 1;37:136–44.
21. Wu TY, Fox DP, Stokes C, Adam C. Work-related stress and intention to quit in newly graduated nurses. *Nurse Educ Today*. 2012 Aug;32(6):669–74.
22. Eckerson CM. The impact of nurse residency programs in the United States on improving retention and satisfaction of new nurse hires: An evidence-based literature review. *Nurse Educ Today*. 2018 Dec;71:84–90.
23. Weurlander M, Lönn A, Seeberger A, Broberger E, Hult H, Wernerson A. How do medical and nursing students experience emotional challenges during clinical placements? *Int J Med Educ*. 2018 Mar 27;9:74–82.
24. Palmer W, Leone C, Appleby J, Trust N. Recruitment of nurses from overseas: Exploring the factors affecting levels of international recruitment. The Nuffield Trust. 2021;
25. Wallis L, Locke R, Ryall S, Harden B. Motivations for choosing an allied health profession career: findings from a scoping review. *International Journal of Practice-based Learning in Health and Social Care*. 2023;11(1):1–17.
26. Kline R. Leadership in the NHS. *BMJ Leader* [Internet]. 2019 Dec 1 [cited 2023 Jan 13];3(4). Available from: <https://bmjleader.bmj.com/content/3/4/129>
27. Colwell FJ. Leadership Strategies to Improve Nurse Retention [Internet]. Walden University; 2019 [cited 2023 Oct 24]. Available from: <https://scholarworks.waldenu.edu/cgi/viewcontent.cgi?article=8059&context=dissertations>

- 1
- 2
- 3
- 4 28. Bhattacharya I, Ramachandran A. A path analysis study of retention of healthcare
- 5 professionals in urban India using health information technology. *Human Resources for*
- 6 *Health*. 2015 Jul 31;13(1):65.
- 7
- 8 29. Duru DC, Hammoud MS. Identifying effective retention strategies for front-line nurses.
- 9 *Nursing Management* [Internet]. 2022 [cited 2023 Oct 24];29(1). Available from:
- 10 [https://journals.rcni.com/nursing-management/evidence-and-practice/identifying-](https://journals.rcni.com/nursing-management/evidence-and-practice/identifying-effective-retention-strategies-for-frontline-nurses-nm.2021.e1971/print/abs)
- 11 [effective-retention-strategies-for-frontline-nurses-nm.2021.e1971/print/abs](https://journals.rcni.com/nursing-management/evidence-and-practice/identifying-effective-retention-strategies-for-frontline-nurses-nm.2021.e1971/print/abs)
- 12
- 13
- 14 30. Creswell JW, Clark VLP. *Designing and conducting mixed methods research*. Sage
- 15 *publications*; 2017.
- 16
- 17 31. QuestionPro. Question Pro [Internet]. 2023 [cited 2023 Feb 17]. Available from:
- 18 <https://www.questionpro.com/blog/research-design/>
- 19
- 20
- 21 32. Bothma CFC, Roodt G. The validation of the turnover intention scale : original research.
- 22 *SA Journal of Human Resource Management*. 2013 Jan;11(1):1–12.
- 23
- 24 33. Sexton JB, Adair KC, Leonard MW, Frankel TC, Proulx J, Watson SR, et al. Providing
- 25 feedback following Leadership WalkRounds is associated with better patient safety
- 26 culture, higher employee engagement and lower burnout. *BMJ Qual Saf*. 2018 Apr
- 27 1;27(4):261–70.
- 28
- 29
- 30 34. Oosthuizen RM, Coetzee M, Munro Z. Work-life balance, job satisfaction and turnover
- 31 intention amongst information technology employees. *Southern African Business Review*.
- 32 2016;20(1):446–67.
- 33
- 34 35. Bonds AA. *Employees' organizational commitment and turnover intentions* [Internet]
- 35 [PhD Thesis]. Walden University; 2017 [cited 2023 Oct 19]. Available from:
- 36 [https://search.proquest.com/openview/58b273b383838952dbc3866b58dcee2a/1?pq-](https://search.proquest.com/openview/58b273b383838952dbc3866b58dcee2a/1?pq-origsite=gscholar&cbl=18750)
- 37 [origsite=gscholar&cbl=18750](https://search.proquest.com/openview/58b273b383838952dbc3866b58dcee2a/1?pq-origsite=gscholar&cbl=18750)
- 38
- 39
- 40 36. Chen X, Tang L, Liu L, Bai Z, Chen R. Factors related to turnover intention among staff of
- 41 elderly caring social organizations in Anhui Province, China: a cross-sectional study. *BMC*
- 42 *Health Serv Res*. 2021 Nov 23;21:1265.
- 43
- 44
- 45 37. Etikan I, Babetope O. A basic approach in sampling methodology and sample size
- 46 calculation. *Med Life Clin*. 2019;1(2):1006.
- 47
- 48
- 49 38. Charan J, Biswas T. How to Calculate Sample Size for Different Study Designs in Medical
- 50 Research? *Indian Journal of Psychological Medicine*. 2013 Apr;35(2):121–6.
- 51
- 52 39. Suffolk and North East Essex NHS Integrated Care Board (ICB). Celebrating Allied Health
- 53 Professions Day [Internet]. 2023 [cited 2023 Oct 19]. Available from:
- 54 [https://suffolkandnortheastsex.icb.nhs.uk/news/celebrating-allied-health-](https://suffolkandnortheastsex.icb.nhs.uk/news/celebrating-allied-health-professions-day/#:~:text=From%20Bury%20St%20Edmunds%20to,of%20life's%20twists%20and%20turns.)
- 55 [professions-](https://suffolkandnortheastsex.icb.nhs.uk/news/celebrating-allied-health-professions-day/#:~:text=From%20Bury%20St%20Edmunds%20to,of%20life's%20twists%20and%20turns.)
- 56 [day/#:~:text=From%20Bury%20St%20Edmunds%20to,of%20life's%20twists%20and%20](https://suffolkandnortheastsex.icb.nhs.uk/news/celebrating-allied-health-professions-day/#:~:text=From%20Bury%20St%20Edmunds%20to,of%20life's%20twists%20and%20turns.)
- 57 [urns.](https://suffolkandnortheastsex.icb.nhs.uk/news/celebrating-allied-health-professions-day/#:~:text=From%20Bury%20St%20Edmunds%20to,of%20life's%20twists%20and%20turns.)
- 58
- 59
- 60

- 1
- 2
- 3
- 4 40. NHS Digital. NHS Workforce Statistics [Internet]. 2023 [cited 2023 Oct 19]. Available from:  
5 [https://digital.nhs.uk/data-and-information/publications/statistical/nhs-workforce-](https://digital.nhs.uk/data-and-information/publications/statistical/nhs-workforce-statistics/january-2023)  
6 [statistics/january-2023](https://digital.nhs.uk/data-and-information/publications/statistical/nhs-workforce-statistics/january-2023)  
7
- 8 41. Allison PD. Missing data: Quantitative applications in the social sciences. *British Journal*  
9 *of Mathematical and Statistical Psychology*. 2002;55(1):193–6.  
10
- 11 42. Bryman A. *Social research methods*. Oxford university press; 2016.  
12
- 13 43. Fusch P, Ness L. Are We There Yet? Data Saturation in Qualitative Research. *Walden*  
14 *Faculty and Staff Publications* [Internet]. 2015 Feb 1;20(9). Available from:  
15 <https://scholarworks.waldenu.edu/facpubs/455>  
16
- 17 44. Guest G, MacQueen KM, Namey EE. *Applied thematic analysis*. Sage Publications; 2011.  
18
- 19 45. Braun V, Clarke V. Using thematic analysis in psychology. *Qualitative research in*  
20 *psychology*. 2006;3(2):77–101.  
21
- 22 46. Patton MQ. *Qualitative research & evaluation methods: Integrating theory and practice*.  
23 *Sage publications*; 2014.  
24
- 25 47. Ritchie J, Spencer L. Qualitative data analysis for applied policy research. In: *Analyzing*  
26 *qualitative data* [Internet]. Routledge; 2002 [cited 2023 Oct 24]. p. 173–94. Available  
27 from:  
28 [https://api.taylorfrancis.com/content/chapters/edit/download?identifierName=doi&ide](https://api.taylorfrancis.com/content/chapters/edit/download?identifierName=doi&identifierValue=10.4324/9780203413081-10&type=chapterpdf)  
29 [ntifierValue=10.4324/9780203413081-10&type=chapterpdf](https://api.taylorfrancis.com/content/chapters/edit/download?identifierName=doi&identifierValue=10.4324/9780203413081-10&type=chapterpdf)  
30
- 31 48. Ritchie J, Spencer L. Qualitative data analysis for applied policy research. In: *Analyzing*  
32 *qualitative data* [Internet]. Routledge; 2002 [cited 2023 Oct 19]. p. 173–94. Available  
33 from:  
34 [https://api.taylorfrancis.com/content/chapters/edit/download?identifierName=doi&ide](https://api.taylorfrancis.com/content/chapters/edit/download?identifierName=doi&identifierValue=10.4324/9780203413081-10&type=chapterpdf)  
35 [ntifierValue=10.4324/9780203413081-10&type=chapterpdf](https://api.taylorfrancis.com/content/chapters/edit/download?identifierName=doi&identifierValue=10.4324/9780203413081-10&type=chapterpdf)  
36
- 37 49. Mertens DM, Hesse-Biber S. Triangulation and Mixed Methods Research: Provocative  
38 *Positions*. *Journal of Mixed Methods Research*. 2012 Apr 1;6(2):75–9.  
39
- 40 50. Poku CA, Donkor E, Naab F. Impacts of Nursing Work Environment on Turnover Intentions:  
41 *The Mediating Role of Burnout in Ghana*. *Nurs Res Pract*. 2022 Feb 27;2022:1310508.  
42
- 43 51. Smokrović E, Kizivat T, Bajan A, Šolić K, Gvozdanić Z, Farčić N, et al. A Conceptual Model  
44 *of Nurses' Turnover Intention*. *Int J Environ Res Public Health*. 2022 Jul 5;19(13):8205.  
45
- 46 52. Jarden RJ, Jarden A, Weiland TJ, Taylor G, Brockenshire N, Gerdtz M. Registered Nurses'  
47 *experiences of psychological well-being and ill-being in their first year of practice: A*  
48 *qualitative meta-synthesis*. *Journal of Advanced Nursing*. 2021;77(3):1172–87.  
49
- 50 53. Freeman M, Baumann A, Akhtar-Danesh N, Blythe J, Fisher A. Employment goals,  
51 *expectations, and migration intentions of nursing graduates in a Canadian border city: a*  
52 *mixed methods study*. *Int J Nurs Stud*. 2012 Dec;49(12):1531–43.  
53  
54  
55  
56  
57  
58  
59  
60

1  
2  
3  
4  
5  
6  
7  
8  
9  
10  
11  
12  
13  
14  
15  
16  
17  
18  
19  
20  
21  
22  
23  
24  
25  
26  
27  
28  
29  
30  
31  
32  
33  
34  
35  
36  
37  
38  
39  
40  
41  
42  
43  
44  
45  
46  
47  
48  
49  
50  
51  
52  
53  
54  
55  
56  
57  
58  
59  
60

For peer review only

**QUESTIONNAIRE\***

**\*Most of items removed because of the Copyright Issue.**

Study title: Securing and retaining a local workforce: An exploration of the elements that provide an environment for growth across two integrated health systems

*Instruction: The questionnaire is divided into three sections. All questions are multi-choice; please choose the response that best applies to you and your experience*

**Section 1: Demographics**

*This section asks demographic questions.*

**1) Please indicate your professional qualification**

- a. Certificate
- b. Undergraduate
- c. Postgraduate
- d. PhD
- e. Other
- f. NA

**2) To which staff group do you belong?**

- a. Nursing/Midwife (NMC Registered)
- b. Nursing/Midwife (N/As HCA, SHCA, Student, etc.)
- c. Qualified AHP (Art therapists, Drama therapists, Music therapists, Podiatrists, Dietitians, Occupational therapists, Operating department practitioners, Orthoptists, Osteopaths, Paramedics, Physiotherapists, Prosthetists and orthotists, Radiographers, Speech and language therapists, etc.)
- d. Senior Manager
- e. Other
- f. NA

**3) What is your gender?**

- a. Male
- b. Female
- c. Rather not say
- d. Other

**4) What is your age?**

.....

**5) What is your ethnicity?**

- a. Asian
- b. Black British
- c. Black or African American
- d. Caucasian or White
- e. Multiracial
- f. Native Hawaiian or Other Pacific Islander

- 1  
2  
3 g. White British  
4 h. Other  
5 i. Prefer not to say  
6  
7

8 **6) What is the highest level of education you have completed?**

- 9 a. CSE  
10 b. OLevel  
11 c. GCSE  
12 d. A Level  
13 e. Bachelor's degree  
14 f. Master's degree  
15 g. Doctoral degree  
16 h. Other  
17 i. NA  
18  
19  
20

21 **7) Which nursing field would you like to work in (for newly qualified nurses only)?**

- 22 a. Adult nursing  
23 b. children's nursing  
24 c. learning disabilities nursing  
25 d. mental health nursing  
26 e. Other  
27 f. NA  
28  
29

30 **8) Which nursing field do you work in (for established nurses only)?**

- 31 a. Adult nursing  
32 b. children's nursing  
33 c. learning disabilities nursing  
34 d. mental health nursing  
35 e. Other  
36 f. NA  
37  
38  
39

40 **9) Which region do you work in?**

- 41 a. East of England  
42 b. London  
43 c. Midlands  
44 d. North East and Yorkshire  
45 e. North West  
46 f. South East  
47 g. South West  
48 h. Other  
49 i. NA  
50  
51  
52

53 **10) How many years of experience do you have in your field?**

54 .....  
55  
56  
57  
58  
59  
60

## Section 2: Turnover intention scale (TIS)

This section explores your experience of your current job and the extent to which you intend to stay at the organisation. Please read each question and indicate your response using the scale provided:

During the past 9 months...

|     |                                                                                                                  |                 |                           |                        |
|-----|------------------------------------------------------------------------------------------------------------------|-----------------|---------------------------|------------------------|
| 1   | How often have you considered leaving your job?                                                                  | Never           | 1-----2-----3-----4-----5 | Always                 |
| 2   | How satisfying is your job in fulfilling your personal needs?                                                    | Very satisfying | 1-----2-----3-----4-----5 | Totally dissatisfying  |
| 3   | How often are you frustrated when not given the opportunity to achieve your personal work-related goals at work? | Never           | 1-----2-----3-----4-----5 | Always                 |
| 4   | How often are your personal values at work compromised?                                                          | Never           | 1-----2-----3-----4-----5 | Always                 |
| 5   | How often do you consider getting another job that suits your needs better?                                      | Never           | 1-----2-----3-----4-----5 | Always                 |
| 6   | How likely are you to accept another job at the same compensation level should it be offered to you?             | Highly unlikely | 1-----2-----3-----4-----5 | Highly likely          |
| 7   | How often do you look forward to another day at work?                                                            | Always          | 1-----2-----3-----4-----5 | Never                  |
| 8   |                                                                                                                  | Never           | 1-----2-----3-----4-----5 | Always                 |
| 9R  |                                                                                                                  | To no extent    | 1-----2-----3-----4-----5 | To a very large extent |
| 10R |                                                                                                                  | To no extent    | 1-----2-----3-----4-----5 | To a very large extent |
| 11  |                                                                                                                  | Never           | 1-----2-----3-----4-----5 | All of the time        |
| 12  |                                                                                                                  | To no extent    | 1-----2-----3-----4-----5 | To a very large extent |
| 13R |                                                                                                                  | To no extent    | 1-----2-----3-----4-----5 | To a very large extent |
| 14  | How frequently do you scan the internet or other sources for alternative job opportunities?                      | Never           | 1-----2-----3-----4-----5 | All of the time        |

## Section 3: Assessment of your work setting Safety, Communication, Operational Reliability, and Engagement (SCORE)

You will be asked questions on organisational practice environment, your specific unit or clinical experience and expertise. Choose your responses using the scale below:

| A                                                                                                                                       | B                 | C       | D              | E              | X              |
|-----------------------------------------------------------------------------------------------------------------------------------------|-------------------|---------|----------------|----------------|----------------|
| Disagree Strongly                                                                                                                       | Disagree Slightly | Neutral | Agree Slightly | Agree Strongly | Not Applicable |
| <b>Improvement Readiness (Practice Environment)</b>                                                                                     |                   |         |                |                |                |
| The practice environment in this work setting utilises input/suggestions from the people who work here.                                 |                   |         |                |                |                |
| A                                                                                                                                       | B                 | C       | D              | E              | X              |
| The practice environment in this work setting effectively fixes defects to improve the quality of what we do.                           |                   |         |                |                |                |
| A                                                                                                                                       | B                 | C       | D              | E              | X              |
| The practice environment in this work setting allows us to gain important insights into what we do well.                                |                   |         |                |                |                |
| A                                                                                                                                       | B                 | C       | D              | E              | X              |
| The practice environment in this work setting is protected by our local management.                                                     |                   |         |                |                |                |
| A                                                                                                                                       | B                 | C       | D              | E              | X              |
| <b>Local Leadership</b>                                                                                                                 |                   |         |                |                |                |
| In this work setting, local management is available at predictable times.                                                               |                   |         |                |                |                |
| A                                                                                                                                       | B                 | C       | D              | E              | X              |
|                                                                                                                                         |                   |         |                |                |                |
|                                                                                                                                         |                   |         |                |                |                |
|                                                                                                                                         |                   |         |                |                |                |
| In this work setting, local management communicates their expectations to me about my performance.                                      |                   |         |                |                |                |
| A                                                                                                                                       | B                 | C       | D              | E              | X              |
| <b>Burnout Climate and Personal Burnout</b>                                                                                             |                   |         |                |                |                |
| Events in this work setting affect the lives of people here in an emotionally unhealthy way.                                            |                   |         |                |                |                |
| A                                                                                                                                       | B                 | C       | D              | E              | X              |
|                                                                                                                                         |                   |         |                |                |                |
|                                                                                                                                         |                   |         |                |                |                |
|                                                                                                                                         |                   |         |                |                |                |
|                                                                                                                                         |                   |         |                |                |                |
|                                                                                                                                         |                   |         |                |                |                |
|                                                                                                                                         |                   |         |                |                |                |
|                                                                                                                                         |                   |         |                |                |                |
|                                                                                                                                         |                   |         |                |                |                |
|                                                                                                                                         |                   |         |                |                |                |
|                                                                                                                                         |                   |         |                |                |                |
|                                                                                                                                         |                   |         |                |                |                |
|                                                                                                                                         |                   |         |                |                |                |
|                                                                                                                                         |                   |         |                |                |                |
|                                                                                                                                         |                   |         |                |                |                |
| <b>Teamwork Climate</b>                                                                                                                 |                   |         |                |                |                |
| Disagreements in this work setting are appropriately resolved (i.e., not <i>who</i> is right, but <i>what</i> is best for the patient). |                   |         |                |                |                |
| A                                                                                                                                       | B                 | C       | D              | E              | X              |
| In this work setting, it is difficult to speak up if I perceive a problem with patient care.                                            |                   |         |                |                |                |
| A                                                                                                                                       | B                 | C       | D              | E              | X              |
| It is easy for personnel here to ask questions when there is something that they do not understand.                                     |                   |         |                |                |                |
| A                                                                                                                                       | B                 | C       | D              | E              | X              |

|    |                                                                                     |   |   |   |   |   |   |  |   |
|----|-------------------------------------------------------------------------------------|---|---|---|---|---|---|--|---|
| 1  |                                                                                     |   |   |   |   |   |   |  |   |
| 2  |                                                                                     |   |   |   |   |   |   |  |   |
| 3  | The people here from different disciplines/backgrounds work together as a well-     | A | B | C | D | E | X |  |   |
| 4  | coordinated team.                                                                   |   |   |   |   |   |   |  |   |
| 5  |                                                                                     |   |   |   |   |   |   |  |   |
| 6  |                                                                                     |   |   |   |   |   |   |  |   |
| 7  |                                                                                     |   |   |   |   |   |   |  |   |
| 8  |                                                                                     |   |   |   |   |   |   |  |   |
| 9  |                                                                                     |   |   |   |   |   |   |  |   |
| 10 |                                                                                     |   |   |   |   |   |   |  |   |
| 11 | <b>Safety Climate</b>                                                               |   |   |   |   |   |   |  |   |
| 12 | My suggestions about quality would be acted upon if I expressed them to management. | A | B | C | D | E | X |  |   |
| 13 |                                                                                     |   |   |   |   |   |   |  |   |
| 14 |                                                                                     |   |   |   |   |   |   |  |   |
| 15 |                                                                                     |   |   |   |   |   |   |  |   |
| 16 |                                                                                     |   |   |   |   |   |   |  |   |
| 17 |                                                                                     |   |   |   |   |   |   |  |   |
| 18 |                                                                                     |   |   |   |   |   |   |  |   |
| 19 |                                                                                     |   |   |   |   |   |   |  |   |
| 20 |                                                                                     |   |   |   |   |   |   |  |   |
| 21 |                                                                                     |   |   |   |   |   |   |  |   |
| 22 |                                                                                     |   |   |   |   |   |   |  |   |
| 23 |                                                                                     |   |   |   |   |   |   |  |   |
| 24 | <b>Regarding growth opportunities in this work setting, I have ...</b>              |   |   |   |   |   |   |  |   |
| 25 | opportunities for personal growth/development.                                      | A | B | C | D | E | X |  |   |
| 26 |                                                                                     |   |   |   |   |   |   |  |   |
| 27 |                                                                                     |   |   |   |   |   |   |  |   |
| 28 |                                                                                     |   |   |   |   |   |   |  |   |
| 29 |                                                                                     |   |   |   |   |   |   |  |   |
| 30 |                                                                                     |   |   |   |   |   |   |  |   |
| 31 | influence in decisions about work activity timelines.                               | A | B | C | D | E | X |  |   |
| 32 |                                                                                     |   |   |   |   |   |   |  |   |
| 33 | <b>Regarding the workload in this work setting, I have ...</b>                      |   |   |   |   |   |   |  |   |
| 34 | too much work to do.                                                                | A | B | C | D | E | X |  |   |
| 35 |                                                                                     |   |   |   |   |   |   |  |   |
| 36 |                                                                                     |   |   |   |   |   |   |  | X |
| 37 |                                                                                     |   |   |   |   |   |   |  | X |
| 38 |                                                                                     |   |   |   |   |   |   |  | X |
| 39 |                                                                                     |   |   |   |   |   |   |  | X |
| 40 |                                                                                     |   |   |   |   |   |   |  | X |
| 41 |                                                                                     |   |   |   |   |   |   |  |   |
| 42 | <b>Regarding participatory decision-making at work ...</b>                          |   |   |   |   |   |   |  |   |
| 43 | the decision-making process is clear to me.                                         | A | B | C | D | E | X |  |   |
| 44 | it is clear to whom should address specific problems.                               | A | B | C | D | E | X |  |   |
| 45 | I can discuss work problems with my direct supervisor/ physician leadership.        | A | B | C | D | E | X |  |   |
| 46 | I can participate in decisions about the nature of my work.                         | A | B | C | D | E | X |  |   |
| 47 |                                                                                     |   |   |   |   |   |   |  |   |
| 48 | I have a direct influence on my organisation's decisions.                           | A | B | C | D | E | X |  |   |
| 49 |                                                                                     |   |   |   |   |   |   |  |   |
| 50 | <b>Regarding job-related uncertainty about the future in this work setting ...</b>  |   |   |   |   |   |   |  |   |
| 51 | I am certain I will still be working here in one year.                              | A | B | C | D | E | X |  |   |
| 52 | I am certain I will keep my current job next year.                                  | A | B | C | D | E | X |  |   |
| 53 | I am certain that I will keep the same functional level as currently.               | A | B | C | D | E | X |  |   |
| 54 |                                                                                     |   |   |   |   |   |   |  |   |
| 55 | <b>Regarding advancement in this organisation...</b>                                |   |   |   |   |   |   |  |   |
| 56 | I can live comfortably on my pay.                                                   | A | B | C | D | E | X |  |   |
| 57 |                                                                                     |   |   |   |   |   |   |  |   |
| 58 |                                                                                     |   |   |   |   |   |   |  |   |
| 59 |                                                                                     |   |   |   |   |   |   |  |   |
| 60 |                                                                                     |   |   |   |   |   |   |  |   |

|    |                                                                 |   |   |   |   |   |   |  |  |
|----|-----------------------------------------------------------------|---|---|---|---|---|---|--|--|
| 1  |                                                                 |   |   |   |   |   |   |  |  |
| 2  |                                                                 |   |   |   |   |   |   |  |  |
| 3  | this organisation pays good salaries.                           | A | B | C | D | E | X |  |  |
| 4  |                                                                 |   |   |   |   |   |   |  |  |
| 5  | I am paid enough for the work I do.                             | A | B | C | D | E | X |  |  |
| 6  |                                                                 |   |   |   |   |   |   |  |  |
| 7  |                                                                 |   |   |   |   |   |   |  |  |
| 8  |                                                                 |   |   |   |   |   |   |  |  |
| 9  |                                                                 |   |   |   |   |   |   |  |  |
| 10 |                                                                 |   |   |   |   |   |   |  |  |
| 11 |                                                                 |   |   |   |   |   |   |  |  |
| 12 | <b>With respect to my intentions to leave this organisation</b> |   |   |   |   |   |   |  |  |
| 13 |                                                                 |   |   |   |   |   |   |  |  |
| 14 | I would like to find a better job.                              | A | B | C | D | E | X |  |  |
| 15 | I often think about leaving this job.                           | A | B | C | D | E | X |  |  |
| 16 |                                                                 |   |   |   |   |   |   |  |  |
| 17 | I have plans to leave this job within 1 yr.                     | A | B | C | D | E | X |  |  |
| 18 |                                                                 |   |   |   |   |   |   |  |  |

19

20

21 *During the past week, how often did this occur?*

| A                                               | B                                          | C                                                       | D                             | X              |
|-------------------------------------------------|--------------------------------------------|---------------------------------------------------------|-------------------------------|----------------|
| Rarely or none of the time<br>(less than 1 day) | Some or a little of the time<br>(1-2 days) | Occasionally or a moderate amount of time<br>(3-4 days) | All of the time<br>(5-7 days) | Not Applicable |
| Skipped a meal                                  | A B C D X                                  | Had difficulty sleeping                                 | A B C D X                     |                |
|                                                 |                                            |                                                         |                               |                |
|                                                 |                                            |                                                         |                               |                |
|                                                 |                                            |                                                         |                               |                |

1  
2  
3  
4  
5  
6  
7  
8  
9  
10  
11  
12  
13  
14  
15  
16  
17  
18  
19  
20  
21  
22  
23  
24  
25  
26  
27  
28  
29  
30  
31  
32  
33  
34  
35  
36  
37  
38  
39  
40  
41  
42  
43  
44  
45  
46  
47  
48  
49  
50  
51  
52  
53  
54  
55  
56  
57  
58  
59  
60

For peer review only

# BMJ Open

## Investigating healthcare workforce recruitment and retention: A mixed methods study protocol

|                                 |                                                                                                                                                          |
|---------------------------------|----------------------------------------------------------------------------------------------------------------------------------------------------------|
| Journal:                        | <i>BMJ Open</i>                                                                                                                                          |
| Manuscript ID                   | bmjopen-2023-074100.R2                                                                                                                                   |
| Article Type:                   | Protocol                                                                                                                                                 |
| Date Submitted by the Author:   | 29-Dec-2023                                                                                                                                              |
| Complete List of Authors:       | Alkan, Erkan; University of Suffolk<br>Cushen-Brewster, Noreen; University of Suffolk<br>Anyanwu, Philip; University of Suffolk                          |
| <b>Primary Subject Heading</b>: | Health services research                                                                                                                                 |
| Secondary Subject Heading:      | Nursing                                                                                                                                                  |
| Keywords:                       | Health policy < HEALTH SERVICES ADMINISTRATION & MANAGEMENT, Nursing Care, Organisation of health services < HEALTH SERVICES ADMINISTRATION & MANAGEMENT |
|                                 |                                                                                                                                                          |

SCHOLARONE™  
Manuscripts

# Investigating healthcare workforce recruitment and retention: A mixed methods study protocol

Erkan Alkan<sup>1\*</sup>, Noreen Cushen-Brewster<sup>1</sup>, Philip Anyanwu<sup>1</sup>

<sup>1</sup> Institute of Health and Well-being, University of Suffolk, Ipswich, UK

\*Corresponding Author, Full Address: Institute of Health and Well-being, University of Suffolk, Waterfront Building, 19 Neptune Quay, Ipswich IP4 1QJ, UK, phone: +441473338357, email: erkan.alkan@open.ac.uk

Noreen Cushen-Brewster: email: n.cushen-brewster2@uos.ac.uk

Philip Anyanwu: email: p.anyanwu2@uos.ac.uk

## Abstract

**Introduction:** Although the sustainability of the health workforce has been identified as essential to achieving health and wider development objectives, challenges with securing and retaining the healthcare workforce persist. In the UK, there are notable shortages across a wide range of National Health Service (NHS) staff groups, with a high staff turnover indicating retention issues in the healthcare workforce. In addition, gaps exist in understanding the root cause of individual organisation's workforce deficiencies and how their practice environment factors interact to impact workforce recruitment and retention.

**Methods and analysis:** An exploratory mixed-methods approach will be conducted to investigate the impact of organisational practice environment factors on healthcare workforce recruitment and retention in two Integrated Care Systems (ICS) in the East of England. We will conduct an online survey of newly qualified and established nurses and allied health professionals using a questionnaire adapted from two validated instruments. Our calculation suggests a sample size of 373 participants; we will aim to surpass this in our recruitment to strengthen the statistical analyses. Multi-level linear regression models will be fitted to evaluate the association between organisational practice environmental factors and staff recruitment and retention. The qualitative interviews will explore the experiences and perspectives of staff and senior leaders to explain the survey results and any significant associations therein. Also, the

1  
2  
3 interviews will explore how to strengthen the partnership between higher education  
4 institutions, Health Education England, health and care service providers, NHS  
5 nursing and allied health professional staff to enhance recruiting and retaining staff.  
6  
7 An exploratory inductive coding and analysis will follow Braun & Clarke's  
8 recommendations to generate key themes from transcribed interview data.  
9  
10  
11  
12

13 **Ethics and dissemination:** Ethical approval has been obtained through the University  
14 of Suffolk Research Ethics Committee (approval number: RETH(S)22/051). Findings  
15 from our work will be disseminated through publications in peer-reviewed journals;  
16 presentations at stakeholders' events, professional and academic conferences; and  
17 short reports for stakeholders, including participating ICSs.  
18  
19  
20  
21

22 **Keywords:** health-workforce, organisational aspect, turnover, retention, recruitment  
23  
24

25 **Word Count:** 2977  
26  
27

### 28 **Strengths and limitations of this study**

29

- 30 • This study will provide new insight into the relationship between turnover  
31 intention and organisational practice environment in nurses and allied health  
32 professionals in the East Anglia region.
- 33 • The study combines qualitative and quantitative research methods to gain a  
34 grounded, multifaceted perspective on the issue of workforce recruitment and  
35 retention.
- 36 • By including healthcare workers and senior leaders, our study will approach the  
37 organisational practice environment issues from different perspectives.
- 38 • The study is confined to the East of England, and while focusing exclusively  
39 on nurses and allied health professionals may limit the generalisation of  
40 findings to other healthcare professions, it remains relevant to the broader UK  
41 healthcare workforce due to the substantial representation of these groups  
42 (38.48%).  
43  
44  
45  
46  
47  
48  
49  
50  
51  
52  
53

## 54 **INTRODUCTION**

55

56  
57 Appropriate staffing and skill mix are crucial determinants of performance and quality  
58 in healthcare delivery. Although the sustainability of the health workforce has been  
59  
60

1  
2  
3 identified as essential to achieving health and wider development objectives[1], a  
4 challenge with securing and retaining the healthcare workforce persists globally[2].  
5 Countries at all socioeconomic development levels face workforce development,  
6 recruitment, and retention issues[1]. Evidence from European countries, including the  
7 UK, suggests an increase in healthcare staff quitting their posts, from 5% to 17%, over  
8 three years[3]. In the UK, a high staff turnover, an indicator of retention issues in the  
9 healthcare workforce, persists[2].  
10  
11  
12  
13  
14  
15

16 There are notable shortages across a wide range of National Health Service (NHS)  
17 staff groups in the UK; the most challenging include nurses and allied health  
18 professionals (AHPs), who are critical to delivering aspirations for 21st-century care  
19 set out in the NHS Long-Term Plan[4,5]. AHPs are a diverse group of professionals  
20 who provide various high-quality care across health and social care pathways. About  
21 230,000 AHPs in 14 professions (including paramedics, physiotherapists,  
22 occupational therapists, and dieticians, among others) worked independently across  
23 the spectrum of care from primary to specialist care provision in the UK in 2021[6].  
24 Recently, there has been a decline in previous achievements to increase the FTE  
25 number of allied health professionals in the UK[7]. A similar trend is seen across the  
26 NHS workforce, including the nursing staff.  
27  
28  
29  
30  
31  
32  
33  
34  
35

36 The Nursing and Midwifery Council's register recorded that 6.5% of nurses left the  
37 register between 2012 and 2013[8]. Most of those who left were of active service age;  
38 only 1.2% of registered nurses left due to retirement. However, nurses quitting rates  
39 may be underreported given that some leave work while still registered, and some take  
40 up shift jobs within the NHS away from direct clinical care[9].  
41  
42  
43  
44  
45

46 Studies have identified structural factors implicated in nurses/AHP workforce  
47 recruitment and retention. For instance, pay level has been reported as important in  
48 nurses/AHP workforce retention[10]. An interplay exists between the cost of living and  
49 nurses/AHP workforce recruitment and retention in the UK. For example, the Royal  
50 College of Nursing members in England, Northern Ireland and Wales held strike  
51 actions in late 2022 and early 2023 on pay dispute, worsened by the current cost of  
52 living crisis[11].  
53  
54  
55  
56  
57  
58  
59  
60

1  
2  
3 Evidence from UK studies suggests that the COVID-19 pandemic further exacerbated  
4 nurses/AHP workforce recruitment and retention issues. COVID-19 infection among  
5 frontline staff, difficult working conditions, increased workload, and burnout are  
6 reported COVID-19-related factors exacerbating healthcare workforce challenges[12–  
7 14].  
8  
9

10  
11  
12 Despite the focus and investment by the Department of Health and Social Care in the  
13 workforce[15,16], there remain considerable challenges in filling the roles required  
14 across both sectors to meet the demands. Many approaches have been explored to  
15 provide the most appropriate solutions; however, overwhelming challenges must be  
16 overcome to improve staff retention across Integrated Care Systems.  
17  
18  
19  
20  
21

22 Recruitment and retention issues affect different aspects of health and care services.  
23 A high turnover and shortage of nurses and AHPs impact care quality, patient  
24 outcomes, and the cost of healthcare delivery[2,17,18]. Studies have shown that a  
25 crucial time for the turnover of nurses is during the first year post-qualification[3,19,20].  
26 Psychological issues, including anxiety and stress due to work pressure in the early  
27 days of work, are common reasons for quitting among newly qualified nurses  
28 (NQNs)[21]. Some studies suggest that professionals, such as nurses, often feel ill-  
29 prepared for their roles and quit their profession; lack of self-confidence has been  
30 implicated in performance rate, stress levels, and the difference between expectations  
31 and reality[22]. Negative experiences during clinical placements, such as a safe  
32 learning environment and lack of health and well-being support from colleagues, can  
33 also influence NQNs negatively[23]. Understanding the organisational practice  
34 environment importance in NQNs' decision on employment within the sector is  
35 essential in reducing turnover and increasing retention.  
36  
37  
38  
39  
40  
41  
42  
43  
44  
45  
46

47 Compared to retention, there is a lack of studies focusing on the factors affecting the  
48 recruitment of nurses and AHPs. These few studies mostly focus on international  
49 recruitments. For instance, according to a report by Nuffield Trust, the pull factors for  
50 moving and working as a nurse in the UK include better pay, career opportunities,  
51 improved working conditions, and long-term financial stability[24]. In terms of factors  
52 affecting the recruitment of AHPs, a scoping review revealed that the opportunity to  
53 help people was a key motivation compared to financially based motivations. The  
54  
55  
56  
57  
58  
59  
60

1  
2  
3 same study also identified the lack of awareness of the profession as the main barrier  
4 to choosing a career in AHP[25].  
5  
6

7  
8 With the emergence of integrated care systems (ICS) in England, there is an  
9 increasing need to upskill and consolidate services across systems to provide  
10 enhanced integration of health and social care rather than just individual  
11 institutions[26]. In addition, given the unprecedented challenges facing the NHS,  
12 systems need healthcare professionals to work differently to meet the needs of the  
13 growing number of people with complex and long-term conditions, many of whom rely  
14 on care and support from different services[26]. An appropriate number of the multi-  
15 professional healthcare workforce is needed to deliver the required care.  
16  
17

18  
19 Although studies have suggested strategies, such as leadership initiatives[27]  
20 improvements in technology[28], and incentives[29], to address workforce recruitment  
21 and retention challenges, a gap still exists in the understanding of individual  
22 organisations' root cause of these deficiencies or insight as to how they relate to each  
23 other or how organisations go about implementing the appropriate strategies to  
24 manage and sustain the quality-of-care delivery.  
25  
26

27  
28 Advancing an understanding of the elements that provide an environment for growth  
29 and job satisfaction among nurses and AHPs will inform innovative strategies to recruit  
30 and retain healthcare workers in the UK. In addressing this, the proposed study will  
31 adopt an exploratory mixed-method approach in investigating healthcare workforce  
32 recruitment and retention in two ICS in the East Anglia region of England. Partnering  
33 with local providers, Higher Education Institutions (HEIs), NHS, and nursing and AHPs  
34 staff, we will explore elements of organisational practice environments that contribute  
35 to recruitment and retention in the Suffolk and North-East Essex (SNEE) ICS and the  
36 Norfolk and Waveney (NW) ICS.  
37  
38

### 39 40 41 42 43 44 45 46 47 48 49 50 51 *Research questions*

- 52  
53 • What factors affect healthcare recruitment, and retention in the United  
54 Kingdom?
- 55  
56 • What elements of organisational practice environments are associated with the  
57 intention to take up employment in healthcare among newly qualified  
58 professionals in the East Anglia region?  
59  
60

- What elements of organisational practice environments are associated with the retention of existing healthcare staff in the East Anglia region?
- Can strengthening the partnership between HEIs, NHS, health and care service providers, NHS nursing and AHPs staff contribute to addressing practice environmental factors implicated in healthcare workforce recruitment and retention?

## METHODS

### Design

A sequential explanatory mixed methods design will be adopted in the proposed study. This involves an ordered combination of quantitative and qualitative research approaches to achieve a breadth and depth of understanding and corroboration/validation of results from both elements[30]. The methodological orientation for the mixed methods will be a quantitative survey → qualitative interviews; this order will advance an understanding of the mechanisms behind any association from the survey.

We systematically reviewed existing literature (research question (RQ) 1) to integrate findings on the factors that impact healthcare recruitment and retention in the United Kingdom into the survey. The review results informed the adaptation of validated measurement instruments (questionnaires) for the survey.

While the survey will enable us to establish associations and patterns concerning organisational environments implicated in recruitment and retention, the interviews will explain the associations, especially the mechanism of impact therein. In addition, the outcome of the survey will inform the qualitative investigation. For instance, the interview guides will be designed to include questions exploring significant associations from the statistical models. Also, unexpected patterns in the results (such as no significant association where expected, an opposite direction of the association, among others) will be further explored in the interviews to help interpret their meaning and importance.

For this study, newly qualified healthcare professionals will be used to refer to those within one year of employment post-qualification; healthcare professionals with more

than one-year post-qualification experience in their area of practice will be referred to as established/retained.

### Phase 1: Quantitative strand

The quantitative strand will involve the analysis of primary data from a cross-sectional survey.

#### *Sample size calculation*

The sample population will include nurses and Allied health professionals representing the six organisations as outlined above, which consists of a population of approximately 12,500.

We used the formula below to calculate the sample size of 373 for the survey[31,32].

$$\text{Sample size} = \frac{N * X}{X + N - 1}$$

$$\text{Where: } X = Z_{\alpha/2}^2 * P (1 - P) / \text{MOE}^2$$

P=Proportion of sample

MOE= Margin of error

N=Population size

$$Z_{-(\alpha/2)} = 1.96$$

Calculation:

$$N \text{ (Population size)} = 12,500$$

$$Z_{\alpha/2} \text{ (Z-score for a 95\% confidence level)} = 1.96$$

$$P=0.5 \text{ for a conservative estimate.}$$

$$\text{MOE}=0.05 \text{ for a 5\% margin of error.}$$

$$X=(1.96)^2 \times 0.5 \times (1-0.5) / (0.05)^2$$

$$X=384.16$$

$$\text{Sample Size} = 12,500 \times 384.16 / (384.16 + 12,500 - 1)$$

$$\text{Sample Size} \approx 372.39$$

The calculated sample size is approximately 372.39. Since the sample size should be a whole number the recommended sample size is approximately 373.

#### *Procedure*

1  
2  
3 An online survey will be launched in the second half of 2023 to collect data from newly  
4 qualified and established nurses and Allied Health professionals on organisational  
5 practice environments implicated in their job recruitment and retention. The survey link  
6 will be live for three weeks. The questionnaire will be hosted online at Questionpro[33],  
7 restricting access to one response per device. The survey link will be primarily  
8 distributed through gatekeepers (practice educators working in organisations within  
9 the ICBs, these organisations will include: East Suffolk & North East Essex NHS  
10 Foundation Trust (ESNEFT), West Suffolk NHS Foundation Trust (WSFT), Norfolk &  
11 Norwich University NHS Foundation Trust (NNUHT), Norfolk & Suffolk Foundation  
12 Trust (NSFT), Norfolk Community Health and Care NHS Trust (NCH&C), and East  
13 Coast Community Healthcare (ECCH),) via email correspondence. Reminders and  
14 constant communications with gatekeepers to follow up on non-responders will be  
15 used to reduce the risk of attrition bias in the survey.  
16  
17  
18  
19  
20  
21  
22  
23  
24  
25

### 26 *Measurement instrument*

27  
28  
29 Data for the survey will be collected using a questionnaire adapted from the validated  
30 instruments from existing studies on organisational practice environment, support  
31 mechanisms, placement cycle, supervisory capacity, compassionate pedagogy,  
32 transition to the registrant, and general infrastructure. Based on the preliminary review  
33 conducted so far, questionnaires will include items from the Turnover Intention Scale  
34 (TIS)[34] and the SCORE questionnaire: Assessment of your work setting Safety,  
35 Communication, Operational Reliability, and Engagement[35].  
36  
37  
38  
39  
40  
41

### 42 *TIS*

43  
44  
45 TIS assesses employees' turnover intention by measuring 15 items, including  
46 statements about their frequency of seeking alternative jobs and considering leaving.  
47 The midpoint of the scale is 18 (3 x 6). If the total score is below 18, it indicates a  
48 desire to stay. If the scores are above 18, it suggests a desire to leave the organisation.  
49 Bothma and Roodt[34] reported a reliability coefficient of  $\alpha = 0.80$  for the TIS.  
50  
51  
52  
53  
54  
55  
56

### 57 *SCORE*

1  
2  
3 The SCORE survey assesses the perception of employees/employers about their  
4 organisation. It includes 73 items measuring 12 domains constituting three subscales:  
5 Safety Culture, Work-Balance, and Engagement and Burnout; the instrument has  
6 good internal reliability ranging from  $\alpha=0.82$  to  $\alpha=0.94$ .  
7  
8  
9

10  
11 These scales have been used in organisational psychology field to show the  
12 relationship between turnover intention and job satisfaction, organisational  
13 commitment, and social support [36–38]. We obtained written permissions to use both  
14 scales from the developers.  
15  
16  
17

18  
19 The adapted questionnaire for the proposed study, which contains 88 items, will be  
20 self-administered (see appendix 1 for a sample of the questionnaire). To ensure  
21 validity following adaptation, the questionnaire will be piloted using 10 participants who  
22 meet the inclusion criteria. We will aim to capture a representative and inclusive range  
23 of perspectives in our study. This will enable us to deliberately include voices from  
24 various demographic categories, such as age, gender, ethnicity, qualification, area of  
25 practice, and geographical location. The pilot study will consider respondents'  
26 perception of the questions, question construct (including the appropriateness of the  
27 format and wording of questionnaires), and the questionnaire's ability to collect  
28 relevant data to answer research questions 2 and 3.  
29  
30  
31  
32  
33  
34  
35

### 36 37 *Variables*

38  
39 The predictors will be variables on opportunities for growth and advancement,  
40 workload, teamwork climate, participation in decision-making, and burnout climate (all  
41 Likert scale measures) as indicators of organisational practice environments. The  
42 outcome variables will differ for the separate models to test RQs 2&3. For RQ2, the  
43 outcomes will be variables on the intention of newly qualified healthcare practitioners  
44 to take up or stay in new employment; while for RQ3, the outcomes will include a  
45 continuous variable on the number of years established healthcare professionals have  
46 remained in employment/practice, intention to leave their current practice and job  
47 satisfaction. Confounders will include participant age, gender, ethnicity, qualification,  
48 area of practice, and geographical location.  
49  
50  
51  
52  
53  
54  
55  
56

### 57 58 *Handling missing data*

59  
60

1  
2  
3 The rate of missing values in the dataset will be assessed to determine the pattern of  
4 missingness. Suppose values are missing at random (that is, participant  
5 characteristics do not determine missingness), we will conduct a multiple imputation  
6 to minimise bias and retain all observed values in the dataset[39]. Results will be  
7 averaged across ten imputed datasets.  
8  
9

### 10 11 12 *Statistical analysis*

13  
14  
15 To explore the relationships in RQs 2&3, we plan to conduct separate multi-level linear  
16 regression models for each outcome variable: newly qualified staff intention to stay  
17 and established staff retention. In these models, we aim to examine their association  
18 with various organisational practice environment measures, including opportunities for  
19 growth and advancement, workload, teamwork climate, participation in decision-  
20 making, and burnout climate. Additionally, we will control for potential confounding  
21 variables, such as age, gender, ethnicity, qualification, area of practice, and  
22 geographical location.  
23  
24  
25  
26  
27  
28

#### 29 30 Assumptions about Variables:

- 31  
32  
33 1. Linearity: We will assume a linear relationship between the predictor variables  
34 (organisational practice environment measures (measured as scale variables)  
35 and age (confounder)) and the outcome variables (staff intention to stay and  
36 staff retention, measured as scale variables).  
37  
38  
39
- 40  
41 2. Independence of Errors: We will assume that the errors of the regression model  
42 are independent of each other.  
43  
44
- 45  
46 3. Homoscedasticity: We will assume constant variance of the errors across all  
47 levels of the predictor variables.  
48  
49
- 50  
51 4. Normality of Residuals: We will assume that the residuals of the regression  
52 model are normally distributed.  
53

54 To ensure the reliability of our results, we plan to adhere to the general guideline of  
55 having a minimum of 10 to 20 cases per predictor variable. Given the number of  
56 predictor variables in our models, our target sample size exceeds this minimum  
57 threshold.  
58  
59  
60

1  
2  
3 All analyses will be performed on Stata statistical software version SE 17.  
4  
5

### 6 *Sensitivity analysis*

7

8 To ensure the imputation of missing values does not introduce bias in the dataset, a  
9 complete case analysis will be conducted to test for consistency with the results from  
10 the main analyses with the imputed dataset.  
11  
12  
13

## 14 **Phase 2: Qualitative strand**

15

### 16 *Procedure*

17

18  
19  
20 In the qualitative strand, we will seek to understand organisational practice  
21 environment factors associated with the recruitment and retention of the health  
22 workforce. The interviews will explore the experiences and perspectives of newly  
23 qualified and established nurses, allied health professionals, and senior leaders within  
24 the NHS ICBs, including education and workforce. In addition, this phase will  
25 contribute to answering RQs 2&3 by advancing an understanding of the associations  
26 established in phase 1. Also, we will use the interviews to explore how to strengthen  
27 the partnership between HEIs, NHS England, health and care service providers, NHS  
28 nursing and AHPs staff to address practice environmental factors implicated in  
29 healthcare workforce recruitment and retention (RQ3).  
30  
31  
32  
33  
34  
35  
36  
37

### 38 *Sample*

39

40  
41 Newly qualified and established nurses, allied health professionals, and senior leaders  
42 within the NHS ICBs, including education and workforce leads with experiences  
43 relevant to the study, will be purposively sampled[40]. We will recruit newly qualified  
44 staff members which will help us to better understand the experience of transition from  
45 a student (pre-employment) to employment. The characteristics of the interview  
46 participants will be informed by the survey results, ensuring those reporting specific  
47 experiences in the survey are interviewed for interpretation and clarification. The  
48 nurses and allied health professionals will be drawn from those who agreed to  
49 participate in the semi-structured interviews when they completed the initial  
50 questionnaire.  
51  
52  
53  
54  
55  
56  
57  
58  
59  
60

1  
2  
3 The experiences and perspectives of participants will be explored until saturation is  
4 achieved[41]. We anticipate achieving saturation within 20 interviews based on the  
5 sufficient information power suggestion[42].  
6  
7  
8

### 9 *Data collection*

10  
11 Semi-structured interviews will be conducted to explore and compare the experiences  
12 of healthcare professionals and senior leaders within different organisations on  
13 supporting, developing, securing and retaining the healthcare workforce. Given the  
14 sequential explanatory mixed methods design, interview questions cannot be finalised  
15 at this stage as these will depend on the survey results.  
16  
17  
18  
19  
20  
21

22 The interviews will be conducted in English via a virtual platform or face-to-face,  
23 depending on the participants' preferences, by three researchers (EA, NC and PA)  
24 with extensive experience in conducting qualitative interviews.  
25  
26  
27

### 28 *Data analysis*

29  
30 Interview audio records will be transcribed verbatim and analysed alongside any field  
31 notes using the thematic analysis method. Inductive coding and analysis will be  
32 conducted per Braun & Clarke's recommendations to generate key themes from the  
33 interview data[43]. With the inductive approach to coding, we expect emerging codes  
34 to be strongly related to the dataset, identifying new concepts and constructs  
35 therein[44]. Themes will be developed from clusters of linked codes of similar construct  
36 and meaning. Codes will be considered for relevance and how they connect and  
37 interact with one another. The data will be interpreted at different levels: within and  
38 between individual interviews (data units). Emerging themes will be frequently  
39 discussed among the research team and collaborators in the project. To ensure  
40 trustworthiness and rigour of the data collection, we will share the raw transcripts with  
41 the participants and seek their feedback to validate the accuracy and interpretation of  
42 their responses. We will also incorporate the Consolidated Criteria for Reporting  
43 Qualitative Research (COREQ) into our methodology[45]. This 32-item checklist for  
44 interviews and focus groups provides a robust framework for reporting qualitative  
45 research methods, ensuring transparency and methodological rigor. By adhering to  
46 the COREQ guidelines, we aim to strengthen the credibility, transferability,  
47 dependability, and confirmability of our qualitative research findings. Finally, we will  
48  
49  
50  
51  
52  
53  
54  
55  
56  
57  
58  
59  
60

1  
2  
3 maintain consistency in coding by establishing clear definitions, and regular team  
4 meetings to resolve coding discrepancies.  
5  
6

7 The NVivo software will be used to facilitate the interview data analysis.  
8  
9

10 **Patient And Public Involvement:** None  
11  
12

13 **Planned Start and End Date:** 31<sup>st</sup> January-2024-31<sup>st</sup> January 2025  
14  
15

## 16 **DISCUSSION**

17  
18 Studies of other populations have reported some organisational practice environment  
19 factors associated with securing and retaining the healthcare workforce. For example,  
20 a recent study in Ghana showed that the work practice environment, including nurse-  
21 physician relations and nurse-manager leadership, affected registered nurses'  
22 turnover intention, and the burnout level of nurses mediated this[46]. Smokrović et al.  
23 found that job satisfaction and absenteeism were the direct predictors of turnover  
24 intention in a Croatian registered nurse population[47]. They also showed that  
25 amotivation, identified regulation, intrinsic motivation, and nurse manager ability,  
26 leadership and support of nurses were indirect predictors of turnover intention  
27 mediated by job satisfaction. Another crucial organisational practice environment  
28 factor in workforce recruitment identified in the existing literature is support for newly  
29 qualified staff[48,49]. These findings demonstrate the need to understand how  
30 organisational practice environments shape staff experiences and employment  
31 decisions. Our proposed study will provide new insight into how region-specific  
32 organisational factors could affect the recruitment and retention of the health  
33 workforce.  
34  
35  
36  
37  
38  
39  
40  
41  
42  
43  
44  
45

46  
47 Based on our results, we will develop a conceptual framework to visually present the  
48 relationship pathways between the organisational practice environment and  
49 healthcare recruitment and retention. The framework will show how organisational  
50 structures interact in influencing outcomes; this will be a valuable resource for  
51 designing strategies to address current issues with the healthcare workforce in the  
52 East Anglia region.  
53  
54  
55  
56

57  
58 *Ethics, data management and dissemination*  
59  
60

1  
2  
3 The proposed study has been approved by the University of Suffolk Research Ethics  
4 Committee (approval number RETH(S)22/051). Before participating in both phases  
5 of the study, participants will be provided with an information sheet, and written  
6 informed consent will be obtained. Confidentiality will be assured to all participants  
7 throughout the study. All data will be anonymised. Interview and survey data will be  
8 securely stored on a password-protected device accessible to only the research  
9 team. After five years following the final day of the study, all data copies will be  
10 securely deleted or shredded.  
11  
12  
13  
14  
15  
16

17  
18 While the project leadership and research governance will be undertaken by two  
19 authors who are experienced academic leads based at the University of Suffolk (PA  
20 and NC), strategic oversight will be provided by a steering group of workforce leaders  
21 across the SNEE and NW ICS'.  
22  
23  
24  
25

26 Findings from our work will be disseminated through publications in peer-reviewed  
27 journals; presentations at stakeholders' events, professional and academic  
28 conferences; and short reports for stakeholders, including participating ICSs.  
29  
30  
31

32 Our study does not require an Integrated Research Application System/Health  
33 Research Authority (IRAS/HRA) approval as it primarily involves interviews and  
34 surveys with NHS staff which does not include any clinical interventions, patient data,  
35 or direct access to patient records. On the contrary, our focus is on the staff's  
36 experience working in healthcare organisation. Given the non-clinical nature of our  
37 study and the absence of patient-related data, our research is considered low risk  
38 and falls within the category of service evaluations or staff-related studies, which  
39 typically do not require IRAS/HRA approval. In addition, we have also run the "Do I  
40 need NHS REC review algorithm" with details of our study, and the system also  
41 confirmed that an NHS ethics approval is not needed for the study.  
42  
43  
44  
45  
46  
47  
48  
49

### 50 *Acknowledgments*

51  
52  
53 We would like to acknowledge Health Education England and the steering committee  
54 members (Dr Paul Driscoll-Evans and Professor Lynne Wigens).  
55  
56

### 57 *Author contributions*

1  
2  
3 Study Design: EA, PA, NB. Proposal Preparation: EA, PA, NB. Prior to submission,  
4 all authors read and have given approval for the final manuscript.  
5  
6

### 7 *Funding*

8  
9  
10 This study was funded initially by Health Education England (RD22061) now merged  
11 with NHS England.  
12  
13

### 14 *Competing Interest*

15  
16  
17 None declared.  
18  
19

### 20 *Ethics Approval*

21  
22  
23 Ethical approval has been obtained through the University of Suffolk Research Ethics  
24 Committee (approval number: RETH(S)22/051). Findings from our work will be  
25 disseminated through publications in peer-reviewed journals; presentations at  
26 stakeholders' events, professional and academic conferences; and short reports for  
27 stakeholders, including participating ICSs.  
28  
29  
30  
31  
32  
33  
34

### 35 **References**

- 36  
37 1 World Health Organization. Global strategy on human resources for health:  
38 Workforce 2030. 2016. file:///C:/Users/e1005260/Downloads/9789241511131-  
39 eng.pdf (accessed 12 January 2023)  
40  
41 2 Zurn P, Dolea C, Stilwell B. Nurse retention and recruitment: developing a  
42 motivated workforce. *The Global Nursing Review Initiative*. Published Online  
43 First: 1 January 2005.  
44  
45 3 Brook J, Aitken L, Webb R, *et al*. Characteristics of successful interventions to  
46 reduce turnover and increase retention of early career nurses: A systematic  
47 review. *International Journal of Nursing Studies*. 2019;91:47–59.  
48  
49 4 NHS. NHS Long Term Plan. 2019. [https://www.longtermplan.nhs.uk/wp-](https://www.longtermplan.nhs.uk/wp-content/uploads/2019/08/nhs-long-term-plan-version-1.2.pdf)  
50 [content/uploads/2019/08/nhs-long-term-plan-version-1.2.pdf](https://www.longtermplan.nhs.uk/wp-content/uploads/2019/08/nhs-long-term-plan-version-1.2.pdf) (accessed 13  
51 January 2023)  
52  
53 5 Alderwick H, Dixon J. The NHS long term plan. *BMJ*. 2019;364:l84.  
54  
55 6 NHS Improvement, NHS England. Allied health professions supporting patient  
56 flow: a quick guide. 2018.  
57 <https://webarchive.nationalarchives.gov.uk/ukgwa/20210415190705/https://impro>  
58  
59  
60

- 1  
2  
3 vement.nhs.uk/resources/allied-health-professions-ahps-supporting-patient-flow/  
4 (accessed 13 January 2023)  
5  
6  
7 7 Buchan J, Charlesworth A, Gershlick B, *et al.* A critical moment: NHS staffing  
8 trends, retention and attrition. *London: Health Foundation.* 2019.  
9  
10 8 Health Education England. Growing nursing numbers: Literature review on  
11 nurses leaving the NHS. 2014.  
12  
13 9 Ford M. 'Even more' nurses considering quitting the profession, survey reveals.  
14 *Nursing Times.* 2020. [https://www.nursingtimes.net/news/workforce/even-more-](https://www.nursingtimes.net/news/workforce/even-more-nurses-considering-quitting-the-profession-survey-reveals-17-07-2020/)  
15 [nurses-considering-quitting-the-profession-survey-reveals-17-07-2020/](https://www.nursingtimes.net/news/workforce/even-more-nurses-considering-quitting-the-profession-survey-reveals-17-07-2020/)  
16 (accessed 13 January 2023)  
17  
18  
19 10 Bimpong KAA, Khan A, Slight R, *et al.* Relationship between labour force  
20 satisfaction, wages and retention within the UK National Health Service: a  
21 systematic review of the literature. *BMJ Open.* 2020;10:e034919.  
22  
23 11 Helm T, Ungood-Thomas J. Nurses pledge tougher new strikes as NHS crisis  
24 deepens. *The Observer.* 2022.  
25 [https://www.theguardian.com/society/2022/dec/17/nurses-pledge-tougher-new-](https://www.theguardian.com/society/2022/dec/17/nurses-pledge-tougher-new-strikes-as-nhs-crisis-deepens)  
26 [strikes-as-nhs-crisis-deepens](https://www.theguardian.com/society/2022/dec/17/nurses-pledge-tougher-new-strikes-as-nhs-crisis-deepens) (accessed 13 January 2023)  
27  
28  
29 12 Erdem H, Lucey DR. Healthcare worker infections and deaths due to COVID-19:  
30 A survey from 37 nations and a call for WHO to post national data on their  
31 website. *International Journal of Infectious Diseases.* 2021;102:239–41.  
32  
33 13 Foye U, Dalton-Locke C, Harju-Seppänen J, *et al.* How has COVID-19 affected  
34 mental health nurses and the delivery of mental health nursing care in the UK?  
35 Results of a mixed-methods study. *Journal of Psychiatric and Mental Health*  
36 *Nursing.* 2021;28:126–37.  
37  
38  
39 14 Wood E, King R, Senek M, *et al.* UK advanced practice nurses' experiences of  
40 the COVID-19 pandemic: a mixed-methods cross-sectional study. *BMJ Open.*  
41 2021;11:e044139.  
42  
43 15 Department of Health and Social Care. Workforce Recruitment and Retention  
44 Fund for adult social care. 2022.  
45 [https://www.gov.uk/government/publications/workforce-recruitment-and-](https://www.gov.uk/government/publications/workforce-recruitment-and-retention-fund-for-adult-social-care/workforce-recruitment-and-retention-fund-for-adult-social-care)  
46 [retention-fund-for-adult-social-care/workforce-recruitment-and-retention-fund-for-](https://www.gov.uk/government/publications/workforce-recruitment-and-retention-fund-for-adult-social-care/workforce-recruitment-and-retention-fund-for-adult-social-care)  
47 [adult-social-care](https://www.gov.uk/government/publications/workforce-recruitment-and-retention-fund-for-adult-social-care/workforce-recruitment-and-retention-fund-for-adult-social-care)  
48  
49  
50 16 House of Commons Health and Social Care Committee. Workforce: recruitment,  
51 training and retention in health and social care. Third Report of Session 2022–23.  
52 2022. chrome-  
53 [extension://efaidnbmnnnibpcajpcgiclfindmkaj/https://committees.parliament.uk/p](https://efaidnbmnnnibpcajpcgiclfindmkaj/https://committees.parliament.uk/publications/23246/documents/171671/default/)  
54 [ublications/23246/documents/171671/default/](https://efaidnbmnnnibpcajpcgiclfindmkaj/https://committees.parliament.uk/publications/23246/documents/171671/default/)  
55  
56  
57 17 Audit Scotland. NHS in Scotland 2017. 2017. [https://www.audit-](https://www.audit-scotland.gov.uk/publications/nhs-in-scotland-2017)  
58 [scotland.gov.uk/publications/nhs-in-scotland-2017](https://www.audit-scotland.gov.uk/publications/nhs-in-scotland-2017)  
59  
60

- 1  
2  
3 18 Kapur N, Ibrahim S, While D, *et al.* Mental health service changes, organisational  
4 factors, and patient suicide in England in 1997–2012: a before-and-after study.  
5 *The Lancet Psychiatry*. 2016;3:526–34.  
6  
7  
8 19 Salt J, Cummings GG, Profetto-McGrath J. Increasing Retention of New  
9 Graduate Nurses: A Systematic Review of Interventions by Healthcare  
10 Organizations. *JONA: The Journal of Nursing Administration*. 2008;38:287.  
11  
12 20 Zhang Y, Qian Y, Wu J, *et al.* The effectiveness and implementation of mentoring  
13 program for newly graduated nurses: A systematic review. *Nurse Education*  
14 *Today*. 2016;37:136–44.  
15  
16 21 Wu T-Y, Fox DP, Stokes C, *et al.* Work-related stress and intention to quit in  
17 newly graduated nurses. *Nurse Educ Today*. 2012;32:669–74.  
18  
19  
20 22 Eckerson CM. The impact of nurse residency programs in the United States on  
21 improving retention and satisfaction of new nurse hires: An evidence-based  
22 literature review. *Nurse Educ Today*. 2018;71:84–90.  
23  
24 23 Weurlander M, Lönn A, Seeberger A, *et al.* How do medical and nursing students  
25 experience emotional challenges during clinical placements? *Int J Med Educ*.  
26 2018;9:74–82.  
27  
28 24 Palmer W, Leone C, Appleby J, *et al.* Recruitment of nurses from overseas:  
29 Exploring the factors affecting levels of international recruitment. *The Nuffield*  
30 *Trust*. 2021.  
31  
32  
33 25 Wallis L, Locke R, Ryall S, *et al.* Motivations for choosing an allied health  
34 profession career: findings from a scoping review. *International Journal of*  
35 *Practice-based Learning in Health and Social Care*. 2023;11:1–17.  
36  
37 26 Kline R. Leadership in the NHS. *BMJ Leader*. 2019;3. doi: 10.1136/leader-2019-  
38 000159  
39  
40 27 Colwell FJ. *Leadership Strategies to Improve Nurse Retention*. 2019.  
41 <https://scholarworks.waldenu.edu/cgi/viewcontent.cgi?article=8059&context=dissertations> (accessed 24 October 2023)  
42  
43  
44 28 Bhattacharya I, Ramachandran A. A path analysis study of retention of  
45 healthcare professionals in urban India using health information technology.  
46 *Human Resources for Health*. 2015;13:65.  
47  
48 29 Saks AM. Antecedents and consequences of employee engagement. *Journal of*  
49 *Managerial Psychology*. 2006;21:600–19.  
50  
51  
52 30 Creswell JW, Clark VLP. *Designing and conducting mixed methods research*.  
53 Sage publications 2017.  
54  
55 31 Etikan I, Babetope O. A basic approach in sampling methodology and sample size  
56 calculation. *Med Life Clin*. 2019;1:1006.  
57  
58  
59  
60

- 1  
2  
3 32 Charan J, Biswas T. How to Calculate Sample Size for Different Study Designs in  
4 Medical Research? *Indian Journal of Psychological Medicine*. 2013;35:121–6.  
5  
6 33 QuestionPro. Question Pro. 2023. [https://www.questionpro.com/blog/research-](https://www.questionpro.com/blog/research-design/)  
7 [design/](https://www.questionpro.com/blog/research-design/) (accessed 17 February 2023)  
8  
9 34 Bothma CFC, Roodt G. The validation of the turnover intention scale : original  
10 research. *SA Journal of Human Resource Management*. 2013;11:1–12.  
11  
12 35 Sexton JB, Adair KC, Leonard MW, *et al*. Providing feedback following  
13 Leadership WalkRounds is associated with better patient safety culture, higher  
14 employee engagement and lower burnout. *BMJ Qual Saf*. 2018;27:261–70.  
15  
16 36 Oosthuizen RM, Coetzee M, Munro Z. Work-life balance, job satisfaction and  
17 turnover intention amongst information technology employees. *Southern African*  
18 *Business Review*. 2016;20:446–67.  
19  
20 37 Bonds AA. *Employees' organizational commitment and turnover intentions*. 2017.  
21 [https://search.proquest.com/openview/58b273b383838952dbc3866b58dcee2a/1](https://search.proquest.com/openview/58b273b383838952dbc3866b58dcee2a/1?pq-origsite=gscholar&cbl=18750)  
22 [?pq-origsite=gscholar&cbl=18750](https://search.proquest.com/openview/58b273b383838952dbc3866b58dcee2a/1?pq-origsite=gscholar&cbl=18750) (accessed 19 October 2023)  
23  
24 38 Chen X, Tang L, Liu L, *et al*. Factors related to turnover intention among staff of  
25 elderly caring social organizations in Anhui Province, China: a cross-sectional  
26 study. *BMC Health Serv Res*. 2021;21:1265.  
27  
28 39 Allison PD. Missing data: Quantitative applications in the social sciences. *British*  
29 *Journal of Mathematical and Statistical Psychology*. 2002;55:193–6.  
30  
31 40 Bryman A. *Social research methods*. Oxford university press 2016.  
32  
33 41 Guest G, MacQueen KM, Namey EE. *Applied thematic analysis*. Sage  
34 Publications 2011.  
35  
36 42 Malterud K, Siersma VD, Guassora AD. Sample Size in Qualitative Interview  
37 Studies: Guided by Information Power. *Qual Health Res*. 2016;26:1753–60.  
38  
39 43 Braun V, Clarke V. Using thematic analysis in psychology. *Qualitative research in*  
40 *psychology*. 2006;3:77–101.  
41  
42 44 Patton MQ. *Qualitative research & evaluation methods: Integrating theory and*  
43 *practice*. Sage publications 2014.  
44  
45 45 Tong A, Sainsbury P, Craig J. Consolidated criteria for reporting qualitative  
46 research (COREQ): a 32-item checklist for interviews and focus groups.  
47 *International Journal for Quality in Health Care*. 2007;19:349–57.  
48  
49 46 Poku CA, Donkor E, Naab F. Impacts of Nursing Work Environment on Turnover  
50 Intentions: The Mediating Role of Burnout in Ghana. *Nurs Res Pract*.  
51 2022;2022:1310508.  
52  
53 47 Smokrović E, Kizivat T, Bajan A, *et al*. A Conceptual Model of Nurses' Turnover  
54 Intention. *Int J Environ Res Public Health*. 2022;19:8205.  
55  
56  
57  
58  
59  
60

- 1  
2  
3 48 Jarden RJ, Jarden A, Weiland TJ, *et al.* Registered Nurses' experiences of  
4 psychological well-being and ill-being in their first year of practice: A qualitative  
5 meta-synthesis. *Journal of Advanced Nursing*. 2021;77:1172–87.  
6  
7  
8 49 Freeman M, Baumann A, Akhtar-Danesh N, *et al.* Employment goals,  
9 expectations, and migration intentions of nursing graduates in a Canadian border  
10 city: a mixed methods study. *Int J Nurs Stud*. 2012;49:1531–43.  
11  
12  
13  
14  
15  
16  
17  
18  
19  
20  
21  
22  
23  
24  
25  
26  
27  
28  
29  
30  
31  
32  
33  
34  
35  
36  
37  
38  
39  
40  
41  
42  
43  
44  
45  
46  
47  
48  
49  
50  
51  
52  
53  
54  
55  
56  
57  
58  
59  
60

For peer review only

**QUESTIONNAIRE\***

**\*Most of items removed because of the Copyright Issue.**

Study title: Securing and retaining a local workforce: An exploration of the elements that provide an environment for growth across two integrated health systems

*Instruction: The questionnaire is divided into three sections. All questions are multi-choice; please choose the response that best applies to you and your experience*

**Section 1: Demographics**

*This section asks demographic questions.*

**1) Please indicate your professional qualification**

- a. Certificate
- b. Undergraduate
- c. Postgraduate
- d. PhD
- e. Other
- f. NA

**2) To which staff group do you belong?**

- a. Nursing/Midwife (NMC Registered)
- b. Nursing/Midwife (N/As HCA, SHCA, Student, etc.)
- c. Qualified AHP (Art therapists, Drama therapists, Music therapists, Podiatrists, Dietitians, Occupational therapists, Operating department practitioners, Orthoptists, Osteopaths, Paramedics, Physiotherapists, Prosthetists and orthotists, Radiographers, Speech and language therapists, etc.)
- d. Senior Manager
- e. Other
- f. NA

**3) What is your gender?**

- a. Male
- b. Female
- c. Rather not say
- d. Other

**4) What is your age?**

.....

**5) What is your ethnicity?**

- a. Asian
- b. Black British
- c. Black or African American
- d. Caucasian or White
- e. Multiracial
- f. Native Hawaiian or Other Pacific Islander

- 1  
2  
3 g. White British  
4 h. Other  
5 i. Prefer not to say  
6  
7

8 **6) What is the highest level of education you have completed?**

- 9 a. CSE  
10 b. OLevel  
11 c. GCSE  
12 d. A Level  
13 e. Bachelor's degree  
14 f. Master's degree  
15 g. Doctoral degree  
16 h. Other  
17 i. NA  
18  
19  
20

21 **7) Which nursing field would you like to work in (for newly qualified nurses only)?**

- 22 a. Adult nursing  
23 b. children's nursing  
24 c. learning disabilities nursing  
25 d. mental health nursing  
26 e. Other  
27 f. NA  
28  
29

30 **8) Which nursing field do you work in (for established nurses only)?**

- 31 a. Adult nursing  
32 b. children's nursing  
33 c. learning disabilities nursing  
34 d. mental health nursing  
35 e. Other  
36 f. NA  
37  
38  
39

40 **9) Which region do you work in?**

- 41 a. East of England  
42 b. London  
43 c. Midlands  
44 d. North East and Yorkshire  
45 e. North West  
46 f. South East  
47 g. South West  
48 h. Other  
49 i. NA  
50  
51  
52

53 **10) How many years of experience do you have in your field?**

54 .....  
55  
56  
57  
58  
59  
60

## Section 2: Turnover intention scale (TIS)

This section explores your experience of your current job and the extent to which you intend to stay at the organisation. Please read each question and indicate your response using the scale provided:

During the past 9 months...

|     |                                                                                                                  |                 |                           |                        |
|-----|------------------------------------------------------------------------------------------------------------------|-----------------|---------------------------|------------------------|
| 1   | How often have you considered leaving your job?                                                                  | Never           | 1-----2-----3-----4-----5 | Always                 |
| 2   | How satisfying is your job in fulfilling your personal needs?                                                    | Very satisfying | 1-----2-----3-----4-----5 | Totally dissatisfying  |
| 3   | How often are you frustrated when not given the opportunity to achieve your personal work-related goals at work? | Never           | 1-----2-----3-----4-----5 | Always                 |
| 4   | How often are your personal values at work compromised?                                                          | Never           | 1-----2-----3-----4-----5 | Always                 |
| 5   | How often do you consider getting another job that suits your needs better?                                      | Never           | 1-----2-----3-----4-----5 | Always                 |
| 6   | How likely are you to accept another job at the same compensation level should it be offered to you?             | Highly unlikely | 1-----2-----3-----4-----5 | Highly likely          |
| 7   | How often do you look forward to another day at work?                                                            | Always          | 1-----2-----3-----4-----5 | Never                  |
| 8   |                                                                                                                  | Never           | 1-----2-----3-----4-----5 | Always                 |
| 9R  |                                                                                                                  | To no extent    | 1-----2-----3-----4-----5 | To a very large extent |
| 10R |                                                                                                                  | To no extent    | 1-----2-----3-----4-----5 | To a very large extent |
| 11  |                                                                                                                  | Never           | 1-----2-----3-----4-----5 | All of the time        |
| 12  |                                                                                                                  | To no extent    | 1-----2-----3-----4-----5 | To a very large extent |
| 13R |                                                                                                                  | To no extent    | 1-----2-----3-----4-----5 | To a very large extent |
| 14  | How frequently do you scan the internet or other sources for alternative job opportunities?                      | Never           | 1-----2-----3-----4-----5 | All of the time        |

## Section 3: Assessment of your work setting Safety, Communication, Operational Reliability, and Engagement (SCORE)

You will be asked questions on organisational practice environment, your specific unit or clinical experience and expertise. Choose your responses using the scale below:

| A                                                                                                                                       | B                 | C       | D              | E              | X              |
|-----------------------------------------------------------------------------------------------------------------------------------------|-------------------|---------|----------------|----------------|----------------|
| Disagree Strongly                                                                                                                       | Disagree Slightly | Neutral | Agree Slightly | Agree Strongly | Not Applicable |
| <b>Improvement Readiness (Practice Environment)</b>                                                                                     |                   |         |                |                |                |
| The practice environment in this work setting utilises input/suggestions from the people who work here.                                 |                   |         |                |                |                |
| A                                                                                                                                       | B                 | C       | D              | E              | X              |
| The practice environment in this work setting effectively fixes defects to improve the quality of what we do.                           |                   |         |                |                |                |
| A                                                                                                                                       | B                 | C       | D              | E              | X              |
| The practice environment in this work setting allows us to gain important insights into what we do well.                                |                   |         |                |                |                |
| A                                                                                                                                       | B                 | C       | D              | E              | X              |
| The practice environment in this work setting is protected by our local management.                                                     |                   |         |                |                |                |
| A                                                                                                                                       | B                 | C       | D              | E              | X              |
| <b>Local Leadership</b>                                                                                                                 |                   |         |                |                |                |
| In this work setting, local management is available at predictable times.                                                               |                   |         |                |                |                |
| A                                                                                                                                       | B                 | C       | D              | E              | X              |
|                                                                                                                                         |                   |         |                |                |                |
|                                                                                                                                         |                   |         |                |                |                |
|                                                                                                                                         |                   |         |                |                |                |
| In this work setting, local management communicates their expectations to me about my performance.                                      |                   |         |                |                |                |
| A                                                                                                                                       | B                 | C       | D              | E              | X              |
| <b>Burnout Climate and Personal Burnout</b>                                                                                             |                   |         |                |                |                |
| Events in this work setting affect the lives of people here in an emotionally unhealthy way.                                            |                   |         |                |                |                |
| A                                                                                                                                       | B                 | C       | D              | E              | X              |
|                                                                                                                                         |                   |         |                |                |                |
|                                                                                                                                         |                   |         |                |                |                |
|                                                                                                                                         |                   |         |                |                |                |
|                                                                                                                                         |                   |         |                |                |                |
|                                                                                                                                         |                   |         |                |                |                |
|                                                                                                                                         |                   |         |                |                |                |
|                                                                                                                                         |                   |         |                |                |                |
|                                                                                                                                         |                   |         |                |                |                |
|                                                                                                                                         |                   |         |                |                |                |
|                                                                                                                                         |                   |         |                |                |                |
|                                                                                                                                         |                   |         |                |                |                |
|                                                                                                                                         |                   |         |                |                |                |
|                                                                                                                                         |                   |         |                |                |                |
|                                                                                                                                         |                   |         |                |                |                |
|                                                                                                                                         |                   |         |                |                |                |
| <b>Teamwork Climate</b>                                                                                                                 |                   |         |                |                |                |
| Disagreements in this work setting are appropriately resolved (i.e., not <i>who</i> is right, but <i>what</i> is best for the patient). |                   |         |                |                |                |
| A                                                                                                                                       | B                 | C       | D              | E              | X              |
| In this work setting, it is difficult to speak up if I perceive a problem with patient care.                                            |                   |         |                |                |                |
| A                                                                                                                                       | B                 | C       | D              | E              | X              |
| It is easy for personnel here to ask questions when there is something that they do not understand.                                     |                   |         |                |                |                |
| A                                                                                                                                       | B                 | C       | D              | E              | X              |

|    |                                                                                     |   |   |   |   |   |   |  |   |
|----|-------------------------------------------------------------------------------------|---|---|---|---|---|---|--|---|
| 1  |                                                                                     |   |   |   |   |   |   |  |   |
| 2  |                                                                                     |   |   |   |   |   |   |  |   |
| 3  | The people here from different disciplines/backgrounds work together as a well-     | A | B | C | D | E | X |  |   |
| 4  | coordinated team.                                                                   |   |   |   |   |   |   |  |   |
| 5  |                                                                                     |   |   |   |   |   |   |  |   |
| 6  |                                                                                     |   |   |   |   |   |   |  |   |
| 7  |                                                                                     |   |   |   |   |   |   |  |   |
| 8  |                                                                                     |   |   |   |   |   |   |  |   |
| 9  |                                                                                     |   |   |   |   |   |   |  |   |
| 10 |                                                                                     |   |   |   |   |   |   |  |   |
| 11 | <b>Safety Climate</b>                                                               |   |   |   |   |   |   |  |   |
| 12 | My suggestions about quality would be acted upon if I expressed them to management. | A | B | C | D | E | X |  |   |
| 13 |                                                                                     |   |   |   |   |   |   |  |   |
| 14 |                                                                                     |   |   |   |   |   |   |  |   |
| 15 |                                                                                     |   |   |   |   |   |   |  |   |
| 16 |                                                                                     |   |   |   |   |   |   |  |   |
| 17 |                                                                                     |   |   |   |   |   |   |  |   |
| 18 |                                                                                     |   |   |   |   |   |   |  |   |
| 19 |                                                                                     |   |   |   |   |   |   |  |   |
| 20 |                                                                                     |   |   |   |   |   |   |  |   |
| 21 |                                                                                     |   |   |   |   |   |   |  |   |
| 22 |                                                                                     |   |   |   |   |   |   |  |   |
| 23 |                                                                                     |   |   |   |   |   |   |  |   |
| 24 | <b>Regarding growth opportunities in this work setting, I have ...</b>              |   |   |   |   |   |   |  |   |
| 25 | opportunities for personal growth/development.                                      | A | B | C | D | E | X |  |   |
| 26 |                                                                                     |   |   |   |   |   |   |  |   |
| 27 |                                                                                     |   |   |   |   |   |   |  |   |
| 28 |                                                                                     |   |   |   |   |   |   |  |   |
| 29 |                                                                                     |   |   |   |   |   |   |  |   |
| 30 |                                                                                     |   |   |   |   |   |   |  |   |
| 31 | influence in decisions about work activity timelines.                               | A | B | C | D | E | X |  |   |
| 32 |                                                                                     |   |   |   |   |   |   |  |   |
| 33 | <b>Regarding the workload in this work setting, I have ...</b>                      |   |   |   |   |   |   |  |   |
| 34 | too much work to do.                                                                | A | B | C | D | E | X |  |   |
| 35 |                                                                                     |   |   |   |   |   |   |  |   |
| 36 |                                                                                     |   |   |   |   |   |   |  | X |
| 37 |                                                                                     |   |   |   |   |   |   |  | X |
| 38 |                                                                                     |   |   |   |   |   |   |  | X |
| 39 |                                                                                     |   |   |   |   |   |   |  | X |
| 40 |                                                                                     |   |   |   |   |   |   |  | X |
| 41 |                                                                                     |   |   |   |   |   |   |  |   |
| 42 | <b>Regarding participatory decision-making at work ...</b>                          |   |   |   |   |   |   |  |   |
| 43 | the decision-making process is clear to me.                                         | A | B | C | D | E | X |  |   |
| 44 | it is clear to whom should address specific problems.                               | A | B | C | D | E | X |  |   |
| 45 | I can discuss work problems with my direct supervisor/ physician leadership.        | A | B | C | D | E | X |  |   |
| 46 | I can participate in decisions about the nature of my work.                         | A | B | C | D | E | X |  |   |
| 47 |                                                                                     |   |   |   |   |   |   |  |   |
| 48 | I have a direct influence on my organisation's decisions.                           | A | B | C | D | E | X |  |   |
| 49 |                                                                                     |   |   |   |   |   |   |  |   |
| 50 | <b>Regarding job-related uncertainty about the future in this work setting ...</b>  |   |   |   |   |   |   |  |   |
| 51 | I am certain I will still be working here in one year.                              | A | B | C | D | E | X |  |   |
| 52 | I am certain I will keep my current job next year.                                  | A | B | C | D | E | X |  |   |
| 53 | I am certain that I will keep the same functional level as currently.               | A | B | C | D | E | X |  |   |
| 54 |                                                                                     |   |   |   |   |   |   |  |   |
| 55 | <b>Regarding advancement in this organisation...</b>                                |   |   |   |   |   |   |  |   |
| 56 | I can live comfortably on my pay.                                                   | A | B | C | D | E | X |  |   |
| 57 |                                                                                     |   |   |   |   |   |   |  |   |
| 58 |                                                                                     |   |   |   |   |   |   |  |   |
| 59 |                                                                                     |   |   |   |   |   |   |  |   |
| 60 |                                                                                     |   |   |   |   |   |   |  |   |

|    |                                                                 |   |   |   |   |   |   |  |  |
|----|-----------------------------------------------------------------|---|---|---|---|---|---|--|--|
| 1  |                                                                 |   |   |   |   |   |   |  |  |
| 2  |                                                                 |   |   |   |   |   |   |  |  |
| 3  | this organisation pays good salaries.                           | A | B | C | D | E | X |  |  |
| 4  |                                                                 |   |   |   |   |   |   |  |  |
| 5  | I am paid enough for the work I do.                             | A | B | C | D | E | X |  |  |
| 6  |                                                                 |   |   |   |   |   |   |  |  |
| 7  |                                                                 |   |   |   |   |   |   |  |  |
| 8  |                                                                 |   |   |   |   |   |   |  |  |
| 9  |                                                                 |   |   |   |   |   |   |  |  |
| 10 |                                                                 |   |   |   |   |   |   |  |  |
| 11 |                                                                 |   |   |   |   |   |   |  |  |
| 12 | <b>With respect to my intentions to leave this organisation</b> |   |   |   |   |   |   |  |  |
| 13 |                                                                 |   |   |   |   |   |   |  |  |
| 14 | I would like to find a better job.                              | A | B | C | D | E | X |  |  |
| 15 | I often think about leaving this job.                           | A | B | C | D | E | X |  |  |
| 16 |                                                                 |   |   |   |   |   |   |  |  |
| 17 | I have plans to leave this job within 1 yr.                     | A | B | C | D | E | X |  |  |
| 18 |                                                                 |   |   |   |   |   |   |  |  |

19

20

21 *During the past week, how often did this occur?*

| A                                               | B                                          | C                                                       | D                             | X              |
|-------------------------------------------------|--------------------------------------------|---------------------------------------------------------|-------------------------------|----------------|
| Rarely or none of the time<br>(less than 1 day) | Some or a little of the time<br>(1-2 days) | Occasionally or a moderate amount of time<br>(3-4 days) | All of the time<br>(5-7 days) | Not Applicable |
| Skipped a meal                                  | A B C D X                                  | Had difficulty sleeping                                 | A B C D X                     |                |
|                                                 |                                            |                                                         |                               |                |
|                                                 |                                            |                                                         |                               |                |
|                                                 |                                            |                                                         |                               |                |

1  
2  
3  
4  
5  
6  
7  
8  
9  
10  
11  
12  
13  
14  
15  
16  
17  
18  
19  
20  
21  
22  
23  
24  
25  
26  
27  
28  
29  
30  
31  
32  
33  
34  
35  
36  
37  
38  
39  
40  
41  
42  
43  
44  
45  
46  
47  
48  
49  
50  
51  
52  
53  
54  
55  
56  
57  
58  
59  
60

For peer review only
